# Supplementary material for: Mutations in the Lysosomal Enzyme–Targeting Pathway and Persistent Stuttering
Source: Atypon-hosted journal article supplement (doi:10.1056/nejmoa0902630), 2010-02-11
Supplement: nejm_kang_677sa1.pdf [file nejm_kang_677sa1.pdf]

## Supplementary Appendix

This appendix has been provided by the authors to give readers additional information about their work.

Supplement to: Kang C, Riazuddin S, Mundorff J, et al. Mutations in the lysosomal enzyme–targeting pathway and persistent stuttering. *N Engl J Med* 2010;362:677-85. DOI: 10.1056/NEJMoa0902630.

## **Supplementary Materials**

Research subject ancestries were determined by self-report using the following categories: White/Caucasian, Black/African American, Hispanic, Asian, Native American, and Other/Unknown.

a

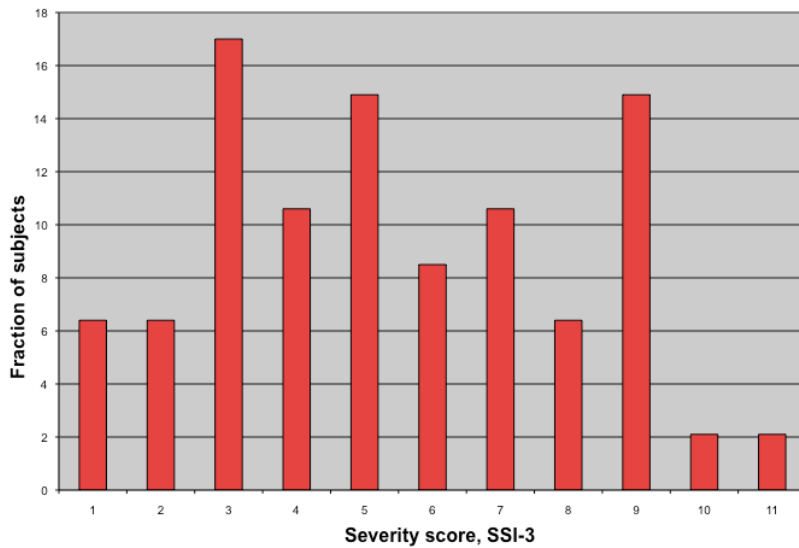

b

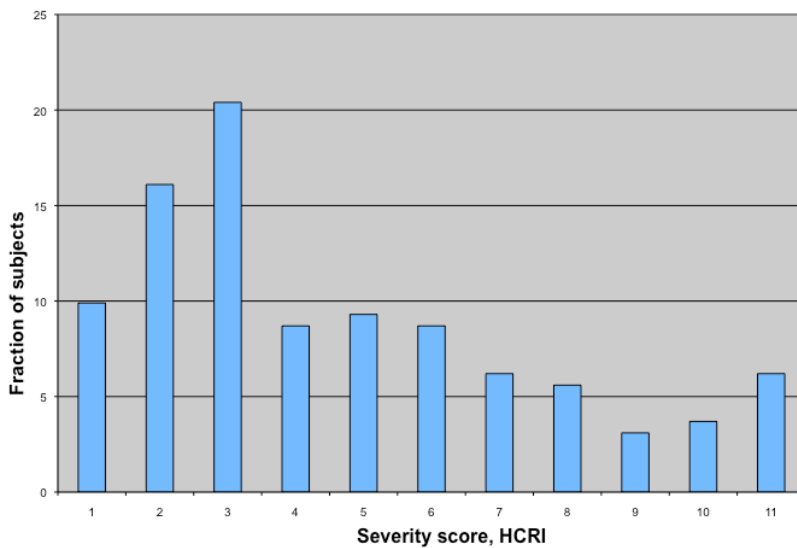

**Supplementary Figure 1. Distributions of severity scores for the SSI-3 and HCRI reading passage dysfluency score. a)** SSI-3 severity scores of the Pakistani subjects (N=47), **b)** severity scores from the HCRI reading passage used for North American affected individuals (N=181). The scores were divided into 10 percentile groups (categories 1-10), plus one more (category 11) to encompass the long tail with small numbers of very severe scores.

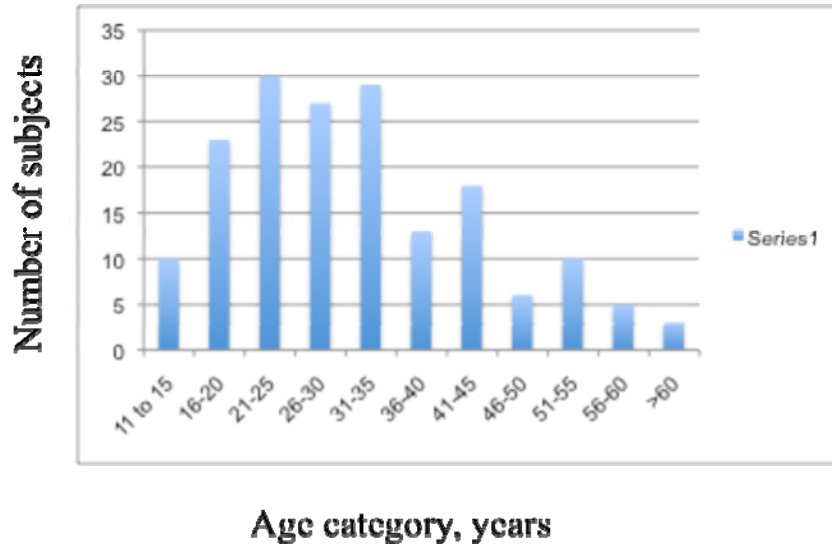

**Supplementary Figure 2. Age distribution of unrelated stuttering subjects.**

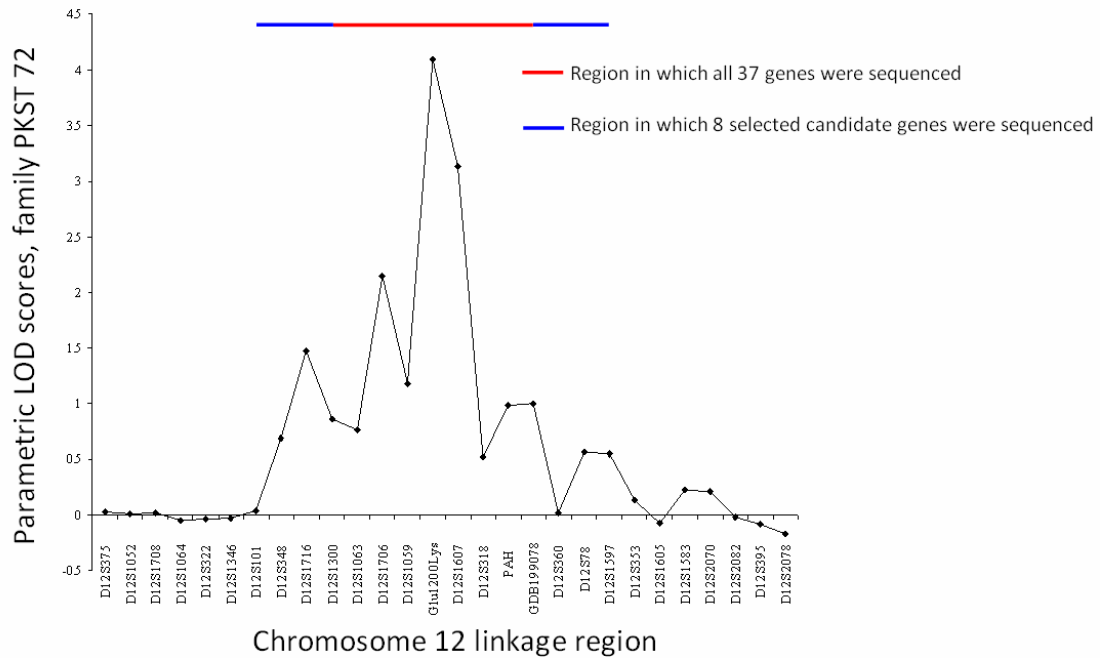

**Supplementary Figure 3. Two-point linkage scores for markers within the chromosome 12 candidate locus for family PKST72.** LOD scores for each marker were obtained using MLINK with penetrance values for the disease locus set at 0.01/0.40/0.80. Of the markers used in the linkage study, D12S1607 showed highest LOD score of 3.13. The Glu200Lys variant of *GNPTAB* (which gave a LOD score of 4.09 under identical analysis parameters) was not included in the initial linkage survey across this region in this family, but is included in this figure to allow convenient comparison.

TTTTTCACCAGGACCGCCTGGCTAGCCCTCACCCCTGGCGCTGGCCTTCCT 1400  
CCTGCTGATCAGCACTGCAGCAAACCTGTCCTTGCTCCTGTCCAGAGCAG 1450  
AGAGGAACCGGGCGCCTGCATGGGGACTATGCATAACCACCCGCTGCAGGAG 1500  
ATGAACGGGGAGCCTCTGGCCGCAGAGAAGGAGCAGCCAGGGGGCGCCCA 1550  
CAACCCCTTCAAGGACTGAagcctcaagctgcccggggtggcacgtcgcg 1600  
aaagcttgtttccccacgggtctggcttctgcaggggaaatctcaaggcca 1650  
ctggcgtggaccatctgggtgtcctcagcccctgtggggcagccaagtctc 1700  
ctgatagcacttgtgcctcagcccctcacctggccacctgccagggcacc 1750  
tgcaaccctagcaataccatgctcgctggagaggctcagctgcctgcttc 1800  
tggcctgcctgtgtctgctgcccgagaagcccgtgccccgggagggctgc 1850  
cgcaactgccaagagtgctccctcctcctggggaaggggctgccaacgaac 1900  
cagactcagTGAaccagctcatgacagaacagcacatcctggccagcacc 1950

**Supplementary Figure 4. A 16-bp deletion mutation in *NAGPA* gene.** The 16 bp deleted region in exon10 of *NAGPA* gene is underlined, and stop codon positions of wild type and mutant are noted in blue and red, respectively. Numbering is based on the cDNA (NM\_016256) sequence of *NAGPA*.

| Gene          | Exon   | rs number     | Amino acid change | Minor allele frequency in unrelated Pakistani controls (N=96) |
|---------------|--------|---------------|-------------------|---------------------------------------------------------------|
| <i>UTP20</i>  | Exon31 | rs111110755   | p.Ser1316Ser      | 0.06                                                          |
| <i>UTP20</i>  | Exon44 | rs12309241    | p.Leu192Leu       | 0.14                                                          |
| <i>GNPTAB</i> | Exon19 | New variation | p.Glu1200Lys      | 0.005                                                         |
| <i>CHPT1</i>  | Exon3  | rs3205421     | p.Ser162Phe       | 0.20                                                          |
| <i>PAH</i>    | Exon6  | rs1126758     | p.Gln232Gln       | 0.45                                                          |
| <i>PAH</i>    | Exon7  | rs1042503     | p.Val245Val       | 0.39                                                          |
| <i>STAB2</i>  | Exon38 | New variation | p.Cys1356Cys      | 0                                                             |
| <i>IKIP</i>   | Exon3  | rs1048906     | p.Gly265Ser       | 0.41                                                          |
| <i>SLC5A8</i> | Exon5  | rs1709189     | p.Val193Ile       | 0.26                                                          |
| <i>SLC5A8</i> | Exon12 | rs164365      | p.Ile490Met       | 0.26                                                          |
| <i>SLC5A8</i> | Exon14 | rs2671444     | p.Tyr554Tyr       | 0.30                                                          |

**Supplementary Table 1. List of frequent variations found in PKST72 family in linkage locus on chromosome 12.** We sequenced exons and exon/intron boundaries in all the 37 genes between D12S1300 and GDB199078 (denoted in red in Supplementary Figure 3), and in one gene between D12S101 and D12S348, and 7 genes between GDB199078 and D12S1597 (denoted in blue in Supplementary Figure 3). In total, exons in 45 out of 87 genes in 10 cM locus on chromosome 12 were sequenced. Variations with minor allele frequencies higher than 10% in PKST72 family are listed, these variations were further genotyped in unrelated Pakistani controls by complete gene sequencing. One synonymous rare variation, Cys1356Cys in *STAB2* was not found in unrelated Pakistani and North American affected and unaffected individuals.

| Genes         | Number of exons | Fragment Name | PCR primers (5' → 3')                                        | Sequencing primers (5' → 3')                                 |  |
|---------------|-----------------|---------------|--------------------------------------------------------------|--------------------------------------------------------------|--|
| <i>GNPTAB</i> | 21              | 5'UTR 2       | FWD: CTGGGCTCCCAGACTCCT<br>REV: AGTTCTGAGGTCTTTTCAAGCA       | FWD: CTGGGCTCCCAGACTCCT<br>REV: AGTTCTGAGGTCTTTTCAAGCA       |  |
|               |                 | 5'UTR 3       | FWD: TCCTGTTGAGTGGCAGATGT<br>REV: ATCCTTTCCTTGGTGCCTCT       | FWD: TCCTGTTGAGTGGCAGATGT<br>REV: ATCCTTTCCTTGGTGCCTCT       |  |
|               |                 | 5'UTR 4       | FWD: AATGCTTTGAATGATGGCAAC<br>REV: TCGAGACTGTGCCATAGACC      | FWD: AATGCTTTGAATGATGGCAAC<br>REV: TCGAGACTGTGCCATAGACC      |  |
|               |                 | 5'UTR 5       | FWD: CACCTTCCCTATGCCCTCCGTCCTC<br>REV: CAGGAGCTTGAACAGCATCA  | FWD: GGAAAGGAGCCACATACAGC<br>REV: CAGGAGCTTGAACAGCATCA       |  |
|               |                 | Exon 1        | FWD: CTATGCCCCCTCCGTCCTC<br>REV: AATCACATACATGCCTTTTCCAGTTCT | FWD: CTATGCCCCCTCCGTCCTC<br>REV: AATCACATACATGCCTTTTCCAGTTCT |  |
|               |                 | Exon 2        | FWD: TTCACCTGGATCTAACACGATG<br>REV: TCAGATGGGCATACTCCTGA     | FWD: TTCACCTGGATCTAACACGATG<br>REV: TCAGATGGGCATACTCCTGA     |  |
|               |                 | Exon 3        | FWD: TGTCATGGTTGGATTACTTCTTCA<br>REV: TCAGTTTACCAGATCCTTTTGT | FWD: TGTCATGGTTGGATTACTTCTTCA<br>REV: TCAGTTTACCAGATCCTTTTGT |  |
|               |                 | Exon 4        | FWD: CAGCCTGGTACCATGTTTTACT<br>REV: TGTACCTAATTTGGGGTCAAAAA  | FWD: CAGCCTGGTACCATGTTTTACT<br>REV: TGTACCTAATTTGGGGTCAAAAA  |  |
|               |                 | Exon 5        | FWD: TCCATGAGATAAAAAGTCTTCATTG<br>REV: TGTTTTGCTTCTTTTGTCAT  | FWD: TCCATGAGATAAAAAGTCTTCATTG<br>REV: TGTTTTGCTTCTTTTGTCAT  |  |
|               |                 | Exon 6        | FWD: TTTTGTCTCCTTCAGCTTCCTT<br>REV: GCATCACAAACAAGCTTCAA     | FWD: TTTTGTCTCCTTCAGCTTCCTT<br>REV: GCATCACAAACAAGCTTCAA     |  |
|               |                 | Exon 7        | FWD: GCTGTTTTCTTTGAGAATCTTTTT<br>REV: TGGCAGAACAGAAATCCCTCT  | FWD: GCTGTTTTCTTTGAGAATCTTTTT<br>REV: TGGCAGAACAGAAATCCCTCT  |  |
|               |                 | Exon 8        | FWD: TGAGGTGAGCAGAGATCGTG<br>REV: TACCAAACCAATGGCAGTGA       | FWD: TGAGGTGAGCAGAGATCGTG<br>REV: TACCAAACCAATGGCAGTGA       |  |
|               |                 | Exon 9        | FWD: TGCTGTCTCTTTGAATTTTGG<br>REV: AGGAAGGGAAGGCAATGAAG      | FWD: TGCTGTCTCTTTGAATTTTGG<br>REV: AGGAAGGGAAGGCAATGAAG      |  |
|               |                 | Exon 10       | FWD: CCCTTTACCTTCTACCTCCA<br>REV: TATGCTTCCCAAGCTGGTCT       | FWD: CCCTTTACCTTCTACCTCCA<br>REV: TATGCTTCCCAAGCTGGTCT       |  |
|               |                 | Exon 11       | FWD: TCAACGCAGCAGGATCTAAA<br>REV: AGGTTTGCACCACCACACTT       | FWD: TCAACGCAGCAGGATCTAAA<br>REV: AGGTTTGCACCACCACACTT       |  |
|               |                 | Exon 12       | FWD: AGGTGATCCAGCCTCCTCTG<br>REV: GAATGCAAGGCTGGTAAAGG       | FWD: AGGTGATCCAGCCTCCTCTG<br>REV: GAATGCAAGGCTGGTAAAGG       |  |
|               |                 | Exon 13_1     | FWD: CAAGGACGACATGCAAATTC<br>REV: GCGTCTTTTGAAGGAGTGA        | FWD: CAAGGACGACATGCAAATTC<br>REV: GCGTCTTTTGAAGGAGTGA        |  |
|               |                 | Exon 13_2     | FWD: TACAGCCCAGAAGGGTTACG<br>REV: AATCAGAGATGGGGCTTTT        | FWD: TACAGCCCAGAAGGGTTACG<br>REV: AATCAGAGATGGGGCTTTT        |  |
|               |                 | Exon 13_3     | FWD: TGCAGAGGTTGACTTTTCCTG<br>REV: TCACACTTGGGCTGTTTCT       | FWD: TGCAGAGGTTGACTTTTCCTG<br>REV: TCACACTTGGGCTGTTTCT       |  |
|               |                 | Exon 14       | FWD: TTTGCTCCTAATGAAGAGTTTCG<br>REV: CTTCAGGGAACCTGTCCAAA    | FWD: TTTGCTCCTAATGAAGAGTTTCG<br>REV: CTTCAGGGAACCTGTCCAAA    |  |
|               |                 | Exon 15       | FWD: CGTGTTTGTAGTTGTTTGCTTG                                  | FWD: CGTGTTTGTAGTTGTTTGCTTG                                  |  |

|              |    |             |                                                              |                                                             |  |
|--------------|----|-------------|--------------------------------------------------------------|-------------------------------------------------------------|--|
|              |    |             | REV: GCTCAGCTGCCTCAGCAT                                      | REV: GCTCAGCTGCCTCAGCAT                                     |  |
|              |    | Exon 16     | FWD: TGGGTATCTCAGAGCCAGA<br>REV: AACAGGACATCCGTTATGG         | FWD: TGGGTATCTCAGAGCCAGA<br>REV: AACAGGACATCCGTTATGG        |  |
|              |    | Exon 17     | FWD: TTGGTGTTTTTCTTACCTCCAGA<br>REV: CCGTAGTGGACTCAACATCCA   | FWD: TTGGTGTTTTTCTTACCTCCAGA<br>REV: CCGTAGTGGACTCAACATCCA  |  |
|              |    | Exon 18     | FWD: TAAAATTTATATGAGATTGTTTGCTG<br>REV: ACTCAACCACCAGCTCCAAC | FWD: AAAATTTATATGAGATTGTTTGCTG<br>REV: ACTCAACCACCAGCTCCAAC |  |
|              |    | Exon 19     | FWD: TCATTCCTCCAGAGAATCAT<br>REV: AGCTTGGGCAACAAGAACAA       | FWD: TCATTCCTCCAGAGAATCAT<br>REV: AGCTTGGGCAACAAGAACAA      |  |
|              |    | Exon 20     | FWD: TTGCAAGACAATGTTTTTGCTG<br>REV: TTGCTGCCTGAATATTGTGAA    | FWD: TTGCAAGACAATGTTTTTGCTG<br>REV: TTGCTGCCTGAATATTGTGAA   |  |
|              |    | Exon 21     | FWD: TGGAAAGAGGAATGATGGAGATT<br>REV: GGAGCCTCTTAGCAATCACTC   | FWD: TGGAAAGAGGAATGATGGAGATT<br>REV: GGAGCCTCTTAGCAATCACTC  |  |
|              |    | 3'UTR 1     | FWD: GCTCATGGACCTGTCACTCCT<br>REV: CAGTGCCATCAGCACTACTCA     | FWD: GCTCATGGACCTGTCACTCCT<br>REV: CAGTGCCATCAGCACTACTCA    |  |
|              |    | 3'UTR 2     | FWD: GACTTCAGCCCTAAGAATGC<br>REV: AGGCTGAGACAGAACTGCTTG      | FWD: GACTTCAGCCCTAAGAATGC<br>REV: AGGCTGAGACAGAACTGCTTG     |  |
|              |    | 3'UTR 3     | FWD: GACCCTCAGGCCATCATT<br>REV: TCAGCACAGAACCTGATACACA       | FWD: GACCCTCAGGCCATCATT<br>REV: TCAGCACAGAACCTGATACACA      |  |
|              |    |             |                                                              |                                                             |  |
| <i>GNPTG</i> | 11 | 5'UTR 1     | FWD: TCACCGATCTCCTCCTCCT<br>REV: TGCCCAGAGAATCCTCCTTA        | FWD: TCACCGATCTCCTCCTCCT<br>REV: TGCCCAGAGAATCCTCCTTA       |  |
|              |    | 5'UTR 2     | FWD: TTGCTGCGAAACAAACATTC<br>REV: GAGACACCGTTTGGGAAGAT       | FWD: TTGCTGCGAAACAAACATTC<br>REV: GAGACACCGTTTGGGAAGAT      |  |
|              |    | 5'UTR 3     | FWD: CCATAGTTCACGGGTTGG<br>REV: CCCGAGGTCGTCTTCATT           | FWD: CCATAGTTCACGGGTTGG<br>REV: CCCGAGGTCGTCTTCATT          |  |
|              |    | 5'UTR 4     | FWD: GCAACGGAGGCAAACCTAGAC<br>REV: GAGAGCGGGTCAGGGTTT        | FWD: GCAACGGAGGCAAACCTAGAC<br>REV: GAGAGCGGGTCAGGGTTT       |  |
|              |    | Exon 1      | FWD: AGGCCCTCAAACCCTGAC<br>REV: TCCTCCACCACCTCATCTT          | FWD: AGGCCCTCAAACCCTGAC<br>REV: TCCTCCACCACCTCATCTT         |  |
|              |    | Exon 2      | FWD: GTTGCTCCTCGGGCTCTC<br>REV: AAGGCTGACAAACCAATGCT         | FWD: GTTGCTCCTCGGGCTCTC<br>REV: AAGGCTGACAAACCAATGCT        |  |
|              |    | Exon 3      | FWD: AAGATGAAGGTGGTGGAGGA<br>REV: ACCTCTCGGAAAGGAAAGGA       | FWD: AAGATGAAGGTGGTGGAGGA<br>REV: ACCTCTCGGAAAGGAAAGGA      |  |
|              |    | Exon 4 & 5  | FWD: CAGACTCTGCCAGTCTTTGC<br>REV: CTCCCCTCGTGCCAGAT          | FWD: CAGACTCTGCCAGTCTTTGC<br>REV: CTCCCCTCGTGCCAGAT         |  |
|              |    | Exon 6 & 7  | FWD: GTGGGATCCTCGGGTGAGT<br>REV: CAAGAGAAGCCAGGCTCAG         | FWD: AGGGATCCCAAAGCAGCA<br>REV: ACCCCACTGGGCTCAACT          |  |
|              |    | Exon 8      | FWD: AGCTGAGCCTGGCTTCTCTT<br>REV: GCCAGCATCCTCAAAAAGTG       | FWD: AGCTGAGCCTGGCTTCTCTT<br>REV: GCCAGCATCCTCAAAAAGTG      |  |
|              |    | Exon 9 & 10 | FWD: CAGGACCTGGCCGATGAG<br>REV: AGTTTCTGCCAAAACACCAG         | FWD: CAGGACCTGGCCGATGAG<br>REV: AGTTTCTGCCAAAACACCAG        |  |
|              |    | Exon 11     | FWD: TACACGAGGCCACAGGT<br>REV: TTATTTGAATGGAATTTCTTAACC      | FWD: TACACGAGGCCACAGGT<br>REV: TTATTTGAATGGAATTTCTTAACC     |  |
|              |    |             |                                                              |                                                             |  |

|              |    |            |                                                                   |                                                         |      |
|--------------|----|------------|-------------------------------------------------------------------|---------------------------------------------------------|------|
| <i>NAGPA</i> | 10 | 5'UTR 1    | FWD: CCAGAAGTGCTGACTGTGGA<br>REV: AGGTGATCCGCCCTCCTC              | FWD: CCAGAAGTGCTGACTGTGGA<br>REV: AGGTGATCCGCCCTCCTC    |      |
|              |    | 5'UTR 2    | FWD: TGCACAGGCAGTTTACTGG<br>REV: TGATACTGTTGCCGGTCTTGC            | FWD: TGCACAGGCAGTTTACTGG<br>REV: TGATACTGTTGCCGGTCTTGC  |      |
|              |    | 5'UTR 3    | FWD: CTTTGTGTCCACGCTCCTTA<br>REV: AAGGCTCCTCAGCCTTTTGT            | FWD: CTTTGTGTCCACGCTCCTTA<br>REV: AAGGCTCCTCAGCCTTTTGT  |      |
|              |    | 5'UTR 4    | FWD: GTGTCCCCACGTTTTTCATTT<br>REV: AATTACCTGCGCTCTTTTCG           | FWD: GTGTCCCCACGTTTTTCATTT<br>REV: AATTACCTGCGCTCTTTTCG |      |
|              |    | Exon 1     | FWD: GAGAGTTCCTTATGCTCTCCTTGC<br>REV: GAGGCCAACTCTCGTGCTC         | FWD: GCTCTCCTTGCAACTTCCTG<br>REV: GGGCAGTAGCAAGTCGTCGT  |      |
|              |    | Exon 2     | FWD: GCACTATTCGGCTTCCTCTG<br>REV: GCGATTTCCTATCCCCATTCT           | FWD: TCCTCTGGGAAGCGTCCGG<br>REV: GTTAAGTGACTTGAACACGG   |      |
|              |    | Exon 3     | FWD: GAATCTAGCAGCCAGGTTGG<br>REV: ATCTTCCTCCCCATGAATCC            | FWD: AGGTTGGGATGGCTAGGGAG<br>REV: CTCCCTAGCCATCCCAACCT  |      |
|              |    | Exon 4     | FWD: GAGACTGGGATGTGCAGAGG<br>REV: GGGGGACAGATAGGTGTCAA            | FWD: GGAGACGAGCAAGGAGGCT<br>REV: CCAGAAAGCAGGTAGAGTCA   |      |
|              |    | Exon 5     | FWD: TGGGTGTGATCTCACGTGTT<br>REV: ACCAACTGACCCTGCTCCTA            | FWD: GCTCTGCACTGTGGAAGGAA<br>REV: AGGGACTGCAGCAATTTCTG  |      |
|              |    | Exon 6 & 7 | FWD: GGTAGACAGGTGAGAAATGGAGAG<br>REV: ACAGTGATGTGCAGGTGAGG        | FWD: GGGCAGCCTGGAGGGAGTT<br>REV: GAGACAGAAGCAGCAGAGGA   |      |
|              |    | Exon 8 & 9 | FWD: ACGTTCAGGGGCTAGTCCAG<br>REV: GAGGCTGGGCACTCGAAG              | FWD: CAGGTATCCTGTCTGTCTGA<br>REV: GGAGAGCTGGTCCCCTTCC   |      |
|              |    | Exon 10    | FWD: TCTTAAATGTTGCCCATCC<br>REV: CAGCGAGCATGGTATTGCTA             | FWD: ACTGCAGCAAACCTGTCTT<br>REV: GGAGGAGGGAGACTCTTTGG   |      |
|              |    |            |                                                                   |                                                         |      |
|              |    |            |                                                                   |                                                         |      |
| <i>VEZT</i>  | 12 | Exon 1     | FWD: CTCTCTCGCTTACACGCTCA<br>REV: TTCCAGGAAGGAAGAGACA             | FWD: CTCTCTCGCTTACACGCTCA                               |      |
|              |    | Exon 2     | FWD: TTGGGTTCTCTGTTGAATTG<br>REV: CAGTGTGAGGAGGATATGGA            | FWD: TTGGGTTCTCTGTTGAATTG                               |      |
|              |    | Exon 3     | FWD: GATTTTCAGGCCTCATTCCA<br>REV: AAAATCAATTGCTGGCCAAA            | FWD: GATTTTCAGGCCTCATTCCA                               |      |
|              |    | Exon 4     | FWD: TCTTCTGAAAATAAACACCACCAA<br>REV: CCCATTTGCTAGGTTGCTGA        | FWD: TCTTCTGAAAATAAACACCACCAA                           |      |
|              |    | Exon 5     | FWD: TCTTTCACATCACCTTCTTAAATGT<br>REV: AAATGCAACATAGAAATGAAAATAGG | FWD: TCTTTCACATCACCTTCTTAAATGT                          | Fail |
|              |    | Exon 6     | FWD: ATCCATTGTTTCCCCACATC<br>REV: TTATTGTCATTCCCCAGGA             | FWD: ATCCATTGTTTCCCCACATC                               |      |
|              |    | Exon 7     | FWD: TGCTGTAAACCTCCTCATCCA<br>REV: GCAGCAAACAATGAGTGGAA           | FWD: TGCTGTAAACCTCCTCATCCA                              |      |
|              |    | Exon 8     | FWD: GGTTCACACACATAATTTGA<br>REV: CACAAGCCAACAACCACAAT            | FWD: GGTTCACACACATAATTTGA                               |      |
|              |    | Exon 9     | FWD: GTGAAAAAGGGGTTTACCA<br>REV: CAAAATGAGAGCCAAGAATTG            | FWD: GTGAAAAAGGGGTTTACCA                                | Fail |
|              |    | Exon 10    | FWD: CTTTGTTCAGGCTGGTGT                                           | FWD: CTTTGTTCAGGCTGGTGT                                 |      |

|                       |   |           |                                                             |                                                            |      |
|-----------------------|---|-----------|-------------------------------------------------------------|------------------------------------------------------------|------|
|                       |   |           | REV: TCCAGCATCCCAAAAGGTAG                                   |                                                            |      |
|                       |   | Exon 11   | FWD: GTGCCAAATGCAAGTCCTTT<br>REV: TTCAACTCACTGCCCATTTCT     | FWD: GTGCCAAATGCAAGTCCTTT                                  |      |
|                       |   | Exon 12_1 | FWD: TCATCAAATCCCTATCTCATTCA<br>REV: TCTGCTTAATGGAGGGCTGT   | FWD: TCATCAAATCCCTATCTCATTCA                               | Fail |
|                       |   | Exon 12_2 | FWD: TAAATCCGCCACAACAGACA<br>REV: TCAAACCAGGGTTCTTCCTG      | FWD: TAAATCCGCCACAACAGACA                                  |      |
|                       |   | 3'UTR     | FWD: GAACCCTGGTTTGAATAA<br>REV: CCAGCACACATCAATTGTATCAA     | FWD: GAACCCTGGTTTGAATAA                                    |      |
|                       |   |           |                                                             |                                                            |      |
| <i>LOC121456</i>      | 1 | Exon 1_1  | FWD: GAGACGGGGGTTTCCTCAT<br>REV: CTCTCTCCGCCTCCTTCTC        | FWD: GAGACGGGGGTTTCCTCAT                                   |      |
|                       |   | Exon 1_2  | FWD: TGGGTAGGGGACTTCGAGTA<br>REV: TGGAGGCAGAAGAAATGTTGA     | FWD: TGGGTAGGGGACTTCGAGTA                                  |      |
|                       |   | Exon 1_3  | FWD: GATCAGGCCTTCAGCACTTT<br>REV: TGGCTGGTAGCCAACAATAG      | FWD: GATCAGGCCTTCAGCACTTT<br>REV: TGGCTGGTAGCCAACAATAG     | Fail |
|                       |   | Exon 1_4  | FWD: CCAGTGACTGTGCTGGTGAT<br>REV: CAGGATCATGCAGGAGAAGA      | FWD: CCAGTGACTGTGCTGGTGAT                                  |      |
|                       |   | Exon 1_5  | FWD: ACAGGCGTTGTAGCTGTCCT<br>REV: CGTTGTGGTCTCTTTGGAG       | FWD: ACAGGCGTTGTAGCTGTCCT                                  |      |
|                       |   | Exon 1_6  | FWD: ATCCTATGCTCGCCAGATGA<br>REV: CTGGGGACTGGTCAGACATC      | FWD: ATCCTATGCTCGCCAGATGA                                  |      |
|                       |   | Exon 1_7  | FWD: TTACCTGAAGCCCATCCTCA<br>REV: TCTAGTCACTGCCACCTC        | FWD: TTACCTGAAGCCCATCCTCA                                  |      |
|                       |   | Exon 1_8  | FWD: AGGGTACCCGCCTAGTGTTT<br>REV: TCAGCTTGACTTGCACCACT      | FWD: AGGGTACCCGCCTAGTGTTT                                  |      |
|                       |   |           |                                                             |                                                            |      |
| <i>LOC643770</i>      | 1 | Exon 1_1  | FWD: CCATCCTGACTGCTTTGTCC<br>REV: TTTTATCTGTGCCAATCTGGT     | FWD: CCATCCTGACTGCTTTGTCC                                  |      |
|                       |   | Exon 1_2  | FWD: AAAGGCATGAAAAGCTTGGA<br>REV: GTGCAGGATTGTCATGAAGG      |                                                            | Fail |
|                       |   | Exon 1_3  | FWD: GCGGAGAACAACCTGACGAT<br>REV: CCACCATGCCTGGCAAAT        | FWD: GCGGAGAACAACCTGACGAT                                  |      |
|                       |   | Exon 1_4  | FWD: CACACACTTTTGAGATTGAATGC<br>REV: AAATCCTTCCAAGGCATCTTA  | FWD: CACACACTTTTGAGATTGAATGC<br>REV: AAATCCTTCCAAGGCATCTTA |      |
|                       |   | Exon 1_5  | FWD: TCAAACTGCCTCAGTTGCT<br>REV: ACTATTGGGCCACACAGAGG       |                                                            |      |
|                       |   |           |                                                             |                                                            |      |
| <i>TMPO isoform a</i> | 4 | 5'UTR 1   | FWD: AGCCGTCTCGCCAATCAC<br>REV: TGCAGGIAGAGCTGGACGTA        | FWD: AGCCGTCTCGCCAATCAC<br>REV: TGCAGGIAGAGCTGGACGTA       | Fail |
|                       |   | Exon 1    | FWD: CTTTGTGTCCGCGAGTTTTT<br>REV: CAGACCCACACGTCAAAGAA      | FWD: CTTTGTGTCCGCGAGTTTTT<br>REV: CAGACCCACACGTCAAAGAA     | Fail |
|                       |   | Exon 2    | FWD: AATGGAATTGCTAAGGCCTAATA<br>REV: CAGTTCTGCTGATAACAAATGA | AATGGAATTGCTAAGGCCTAATA                                    |      |
|                       |   | Exon 3    | FWD: TCGTGAGCCACTATGTCTGG                                   | FWD: TCGTGAGCCACTATGTCTGG                                  | Fail |

|                                 |   |          |                                                              |                                                      |      |
|---------------------------------|---|----------|--------------------------------------------------------------|------------------------------------------------------|------|
|                                 |   |          | REV: TTGCAATTTGAGGTGATGGA                                    | REV: TTGCAATTTGAGGTGATGGA                            |      |
|                                 |   | Exon 4_1 | FWD: GCTTTGTCTACCAGGGCAAA<br>REV: TCAGGCTGAGAAGATGACGA       | FWD: GCTTTGTCTACCAGGGCAAA                            |      |
|                                 |   | Exon 4_2 | FWD: TCTTGTGCCACAACTTGC<br>REV: CCAGTGGGGGCATAGAGTTA         | FWD: TCTTGTGCCACAACTTGC                              |      |
|                                 |   | Exon 4_3 | FWD: CAGATCAATCGCCTCTCTCC<br>REV: CTGTCAACTTGCTGCCATTC       | FWD: CAGATCAATCGCCTCTCTCC                            |      |
|                                 |   | Exon 4_4 | FWD: CCTGGATCCGAACTGATGTC<br>REV: GCTTGGTGGGTACGACTAGG       | FWD: CCTGGATCCGAACTGATGTC                            |      |
|                                 |   | Exon 4_5 | FWD: AGGTATTCAAGCAGCCTCCA<br>REV: GAAAAATGTTGGCATAAAAGTACCTG | FWD: AGGTATTCAAGCAGCCTCCA                            |      |
|                                 |   | Exon 4_6 | FWD: TGGCTGAAGGATTGCAAAAT<br>REV: TGTCTAGGTATAAAGGAGGATGC    | FWD: TGGCTGAAGGATTGCAAAAT                            |      |
|                                 |   |          |                                                              |                                                      |      |
| <i>TMPO</i><br><i>Isoform b</i> | 9 | Exon 1   | FWD: AGCCGTCTCGCCAATCAC<br>REV: TGCAGGTAGAGCTGGACGTA         | FWD: AGCCGTCTCGCCAATCAC<br>REV: TGCAGGTAGAGCTGGACGTA | Fail |
|                                 |   | Exon 2   | FWD: AATGGAATTGCTAAGGCCTAATA<br>REV: CAGGTTCTGCTGATAACAAATGA | FWD: AATGGAATTGCTAAGGCCTAATA                         |      |
|                                 |   | Exon 3   | FWD: TCGTGAGCCACTATGTCTGG<br>REV: TTGCAATTTGAGGTGATGGA       | FWD: TCGTGAGCCACTATGTCTGG                            | Fail |
|                                 |   | Exon 4_1 | FWD: GCTTTGTCTACCAGGGCAAA<br>REV: TCAGGCTGAGAAGATGACGA       | FWD: GCTTTGTCTACCAGGGCAAA                            |      |
|                                 |   | Exon 4_2 | FWD: TCTTGTGCCACAACTTGC<br>REV: CCAGTGGGGGCATAGAGTTA         | FWD: TCTTGTGCCACAACTTGC                              |      |
|                                 |   | Exon 4_3 | FWD: CAGATCAATCGCCTCTCTCC<br>REV: CTGTCAACTTGCTGCCATTC       | FWD: CAGATCAATCGCCTCTCTCC                            |      |
|                                 |   | Exon 4_4 | FWD: CCTGGATCCGAACTGATGTC<br>REV: GCTTGGTGGGTACGACTAGG       | FWD: CCTGGATCCGAACTGATGTC                            |      |
|                                 |   | Exon 4_5 | FWD: AGGTATTCAAGCAGCCTCCA<br>REV: GAAAAATGTTGGCATAAAAGTACCTG | FWD: AGGTATTCAAGCAGCCTCCA                            |      |
|                                 |   | Exon 4_6 | FWD: TGGCTGAAGGATTGCAAAAT<br>REV: TGTCTAGGTATAAAGGAGGATGC    | FWD: TGGCTGAAGGATTGCAAAAT                            |      |
|                                 |   | Exon 5&6 | FWD: TTCATGGCTTCTCAGTGTGC<br>REV: TTTGCCAAAATTCACCACCT       | FWD: TTCATGGCTTCTCAGTGTGC                            |      |
|                                 |   | Exon 7   | FWD: TGTGTTTGTAGGCTGTGTTGC<br>REV: CTCCCTCCCACTCCAAAAA       | FWD: TGTGTTTGTAGGCTGTGTTGC                           |      |
|                                 |   | Exon 8   | FWD: TTGAAGAGAGCCTTGGAAGC<br>REV: CATTGTACCTGGCTCCAAAAA      | FWD: TTGAAGAGAGCCTTGGAAGC                            |      |
|                                 |   | Exon 9   | FWD: TTGGAATTAGGAGTGGCAATG<br>REV: CATTATTGAGGCGAAATCACA     | FWD: TTGGAATTAGGAGTGGCAATG                           |      |
|                                 |   |          |                                                              |                                                      |      |
| <i>PPIAP8</i>                   | 1 | Exon 1_1 | FWD: CCCAAAATATGCAGGGAAA<br>REV: AAGCACTCCATGGTCTCCAC        | FWD: CCCAAAATATGCAGGGAAA                             |      |
|                                 |   | Exon 1_2 | FWD: AACTTCATCCGGAAGCATACA<br>REV: ACAATTGTCCAAGGGACAGC      | FWD: AACTTCATCCGGAAGCATACA                           |      |

|                |    |          |                                                              |                                                              |      |
|----------------|----|----------|--------------------------------------------------------------|--------------------------------------------------------------|------|
| <i>SLC25A3</i> | 7  | 5'UTR 1  | FWD: CTGCGCAGAACGAATCCT<br>REV: CCTTCGAAAGAGGCTGCTC          | FWD: CTGCGCAGAACGAATCCT                                      |      |
|                |    | 5'UTR 2  | FWD: ACCTTTCCAAGGGAGTGGTT<br>REV: ACTGTATTGGGCAGGGTCTG       | FWD: ACCTTTCCAAGGGAGTGGTT                                    |      |
|                |    | Exon 1   | FWD: GTGGAGACGGGAAGGAAAAG<br>REV: TATGGTGGAAAAGGCCGATA       | FWD: GTGGAGACGGGAAGGAAAAG                                    |      |
|                |    | Exon 2   | FWD: CAGGTTTGTGTTTGCATGCTG<br>REV: CTGAAGTTTCTAGCAGTTGTGATG  | FWD: CAGGTTTGTGTTTGCATGCTG                                   |      |
|                |    | Exon 3   | FWD: TTGCTGAAATTTATTATGGAACC<br>REV: CACTTTGTAGGACCATTTCTTCA | FWD: TTGCTGAAATTTATTATGGAACC<br>REV: CACTTTGTAGGACCATTTCTTCA | Fail |
|                |    | Exon 4   | FWD: TTCCATATCATCGTGTGTTACTTT<br>REV: AGGAGATGGAGACGGTGAAG   | FWD: TTCCATATCATCGTGTGTTACTTT                                |      |
|                |    | Exon 5   | FWD: GCTGCCATTTGTTACTATCAGG<br>REV: AAACACTGCTTTATAACCTTTGGA | FWD: GCTGCCATTTGTTACTATCAGG                                  |      |
|                |    | Exon 6   | FWD: GTACCCGTGTCACCCTGAGT<br>REV: GGCAAACAGTCCCTCCATA        | FWD: GTACCCGTGTCACCCTGAGT                                    |      |
|                |    | Exon 7   | FWD: GCAGTGCTTCTCTGGTCCCTC<br>REV: TCACAGGCAAATCATGAAGA      | FWD: GCAGTGCTTCTCTGGTCCCTC                                   |      |
|                |    | 3'UTR 1  | FWD: GGACTGTTTGCCCGTATCAT<br>REV: TGGAATATTC AACCAACAATGG    | FWD: GGACTGTTTGCCCGTATCAT                                    |      |
|                |    | 3'UTR 2  | FWD: TCTTCATGATTTGCCTGTGA<br>REV: GAATCAGCCTAATTTGGTTTACCT   | FWD: TCTTCATGATTTGCCTGTGA                                    |      |
| <i>IKIP</i>    | 3  | Exon 1   | FWD: ACTCAGTGAAGCAACGAGGA<br>REV: TTCCTTTGGGGTCAAGACAG       | FWD: ACTCAGTGAAGCAACGAGGA<br>REV: TTCCTTTGGGGTCAAGACAG       |      |
|                |    | Exon 2   | FWD: CCTACAGCTACCCATACCAGAA<br>REV: GGCTCAGAGGGAGAATGTCA     | FWD: CCTACAGCTACCCATACCAGAA                                  |      |
|                |    | Exon 3_1 | FWD: CCATCCTGGGTAAACAGAACAA<br>REV: ACTGCTTGAAAGAAGATCACCTA  | FWD: ACTGCTTGAAAGAAGATCACCTA                                 |      |
|                |    | Exon 3_2 | FWD: TCTGACGACGCTTTCTCAAG<br>REV: CGGTAACCAATCTCCCAATG       | FWD: TCTGACGACGCTTTCTCAAG                                    |      |
|                |    | Exon 3_3 | FWD: GAAGGTGACAGAGCCAAAGTTC<br>REV: CAACATGTATGTCAGAAGGATGG  | FWD: GAAGGTGACAGAGCCAAAGTTC                                  |      |
| <i>APAF1</i>   | 26 | 5'UTR 1  | FWD: GGGCTTGGGGTGTGTTTAT<br>REV: GTTTTCCACCGGGAATTAGG        | FWD: GGGCTTGGGGTGTGTTTAT                                     | Fail |
|                |    | 5'UTR 2  | FWD: GTGTCCAGTAGTGGGGTCCA<br>REV: TGGTACAGGAGCAGGATGGT       | FWD: GTGTCCAGTAGTGGGGTCCA                                    | Fail |
|                |    | Exon 1   | FWD: GCACTGGGTTTTGTCCATTT<br>REV: TGCTCTTGCTGTGAGTGG         | FWD: GCACTGGGTTTTGTCCATTT                                    |      |
|                |    | Exon 2   | FWD: GCTCTCTGAAGCAGTCCACAC<br>REV: TGCAGTTTTCAGTGAACCTGGTC   | FWD: GCTCTCTGAAGCAGTCCACAC                                   |      |
|                |    | Exon 3   | FWD: CACATTTTCTTAACCTCTCTTGAA<br>REV: GGAAGCTTGCTCATCCATCC   | FWD: CACATTTTCTTAACCTCTCTTGAA                                |      |

|  |  |         |                                                                 |                                                                 |      |
|--|--|---------|-----------------------------------------------------------------|-----------------------------------------------------------------|------|
|  |  | Exon 4  | FWD: GCCTACCAGTATCTTGCACGTAA<br>REV: GCCGCAATGGTTCTCTCTTA       | FWD: GCCTACCAGTATCTTGCACGTAA                                    |      |
|  |  | Exon 5  | FWD: AGAGTATAGCAAAGAGGAAGAATCA<br>REV: GGACTACATATTTAGGACCTGCAA | FWD: AGAGTATAGCAAAGAGGAAGAATCA<br>REV: GGACTACATATTTAGGACCTGCAA |      |
|  |  | Exon 6  | FWD: CAACCAGAGACAAGAGTGTTACAGA<br>REV: AACACACTGTGGGTAGATGGTAAA | FWD: CAACCAGAGACAAGAGTGTTACAGA                                  |      |
|  |  | Exon 7  | FWD: GCTTTTGATAACATGCAGCAG<br>REV: AACACCCACCACCTCAGT           | FWD: GCTTTTGATAACATGCAGCAG<br>REV: AACACCCACCACCTCAGT           |      |
|  |  | Exon 8  | FWD: TCTTGAGGAGTAGCTGAGTTTCTT<br>REV: TCTGGCTTTAACAAGTACTATGG   | FWD: TCTTGAGGAGTAGCTGAGTTTCTT                                   |      |
|  |  | Exon 9  | FWD: TCGAAGTCCTGGCCTCAA<br>REV: CACTCCAGCCTGAGAAAACAA           | FWD: TCGAAGTCCTGGCCTCAA                                         | Fail |
|  |  | Exon 10 | FWD: TGGATGTGTTCTTTCTCACTAGC<br>REV: CCAAAAATCAAAGGAGGGAAA      | FWD: TGGATGTGTTCTTTCTCACTAGC                                    |      |
|  |  | Exon 11 | FWD: AATGGTTGGCTGTTCAATTTT<br>REV: TAAAAGTTCCAGCCCTTCG          | FWD: AATGGTTGGCTGTTCAATTTT                                      |      |
|  |  | Exon 12 | FWD: TGTCATTTGCATGTTAGTAATCTGA<br>REV: GAGCTGGATTCTCTGTATTTC    | FWD: TGTCATTTGCATGTTAGTAATCTGA                                  |      |
|  |  | Exon 13 | FWD: TTTGCCAAGGTTCTTTCTG<br>REV: CCTGGGTACAGAGCAAAT             | FWD: TTTGCCAAGGTTCTTTCTG                                        |      |
|  |  | Exon 14 | FWD: GGGGAGAGGTTTCATTAGCA<br>REV: CTGAAGCCATGCTCCCTCTA          | FWD: GGGGAGAGGTTTCATTAGCA                                       |      |
|  |  | Exon 15 | FWD: TGTTTGATACGTTTGTGTTACTGTG<br>REV: TCCTGGAAATTGAAAGAAGCA    | FWD: TGTTTGATACGTTTGTGTTACTGTG                                  |      |
|  |  | Exon 16 | FWD: TGGGCAGTGCTTCTAATTTT<br>REV: AGACTGCCAAAATCACACA           | FWD: TGGGCAGTGCTTCTAATTTT                                       |      |
|  |  | Exon 17 | FWD: TGTCAATAATTATGCCAGTTATCAG<br>REV: ATGCTTGCTGAATTCCTCTG     | FWD: TGTCAATAATTATGCCAGTTATCAG                                  |      |
|  |  | Exon 18 | FWD: TTTTGATAGTGTGTTTCTGAGCA<br>REV: ACAGCACTTTCCAGGGTGA        | FWD: TTTTGATAGTGTGTTTCTGAGCA                                    |      |
|  |  | Exon 19 | FWD: CTGAGGAATTTGGCTCTGG<br>REV: AATGCTGCTGGACACCTGTT           | FWD: CTGAGGAATTTGGCTCTGG                                        |      |
|  |  | Exon 20 | FWD: TCCCCTGAGAGCTCTTGTG<br>REV: GGCTGTGATCGTGCACTGT            | FWD: TCCCCTGAGAGCTCTTGTG                                        |      |
|  |  | Exon 21 | FWD: ATTAGGCTGGAAGCACCAGA<br>REV: AGGTTTCATCTAAGCCCATGT         | FWD: ATTAGGCTGGAAGCACCAGA                                       |      |
|  |  | Exon 22 | FWD: TCCTCTCTGTTTTACTGAAATGC<br>REV: TGTAGGTGACTGCAATTAACAGAA   | FWD: TCCTCTCTGTTTTACTGAAATGC                                    |      |
|  |  | Exon 23 | FWD: AAGGGGTCAGAACAGCCAGT<br>REV: GGCATCCTCCAAAAGATCAC          | FWD: AAGGGGTCAGAACAGCCAGT<br>REV: GGCATCCTCCAAAAGATCAC          |      |
|  |  | Exon 24 | FWD: CTGGAACCTGGGCATCTCAT<br>REV: GCCTCATCCAACCACAACCTT         | FWD: CTGGAACCTGGGCATCTCAT                                       |      |
|  |  | Exon 25 | FWD: AAATGCCACTGGAAATAAATGG<br>REV: GCCTTGACCTCACAGACTCC        | FWD: AAATGCCACTGGAAATAAATGG                                     |      |
|  |  | Exon 26 | FWD: AAGAGGCTGACCAGGTTGAA                                       | FWD: AAGAGGCTGACCAGGTTGAA                                       |      |

|                         |    |           |                                                               |                                                       |      |
|-------------------------|----|-----------|---------------------------------------------------------------|-------------------------------------------------------|------|
|                         |    |           | REV: TCCAACCACAAAACACTTTTGTA                                  |                                                       |      |
|                         |    | 3'UTR     | FWD: TTCTAATGAAACCCTGATATCAACT<br>REV: GCTGCAGACTATGCACACAGA  | FWD: TTCTAATGAAACCCTGATATCAACT                        |      |
| <i>ANKS1B isoform a</i> | 26 | 5'UTR     | FWD: ACTCTCTCTGCCGCCTCCT<br>REV: GCCAGACAGGAGTTTCTCCA         | FWD: ACTCTCTCTGCCGCCTCCT<br>REV: GCCAGACAGGAGTTTCTCCA | Fail |
|                         |    | Exon 1    | FWD: CCCTGGATTTTGGGGAGT<br>REV: GCAATAACCGTGAGGAGGAG          | FWD: CCCTGGATTTTGGGGAGT                               |      |
|                         |    | Exon 2    | FWD: GGGCTACCAGCCTTCTTTTT<br>REV: GAGACATGAGAAAGGTATCGTCAA    | FWD: GGGCTACCAGCCTTCTTTTT                             |      |
|                         |    | Exon 3    | FWD: CTCTAAATCCCACCCAGCA<br>REV: GCCTTTGGGCAAGGTAAAG          | FWD: CTCTAAATCCCACCCAGCA                              |      |
|                         |    | Exon 4    | FWD: CATTTCAAAGCATTGCAGGTT<br>REV: TTCCAAAAGTAGGTGGCATA       | FWD: CATTTCAAAGCATTGCAGGTT                            |      |
|                         |    | Exon 5    | FWD: TGTGAGCATTATTTCAACCTG<br>REV: TTTCCCTTTGCTATTCCCAAAA     | FWD: TGTGAGCATTATTTCAACCTG                            |      |
|                         |    | Exon 6    | FWD: TCACTTTCAATGCTTGGTCTG<br>REV: ACTCAAAATCCAAAAGAAAAGTGT   | FWD: TCACTTTCAATGCTTGGTCTG                            |      |
|                         |    | Exon 7    | FWD: TTGAAGTTCTTTGAAAAGTTAGGA<br>REV: GGCTGAGAAGCCCTAATCAGTA  | FWD: TTGAAGTTCTTTGAAAAGTTAGGA                         |      |
|                         |    | Exon 8    | FWD: CAGCAGAATAGTGCTGACTGCTT<br>REV: ATGCACCACATCCCATACTT     | FWD: CAGCAGAATAGTGCTGACTGCTT                          |      |
|                         |    | Exon 9    | FWD: GCTGACTTGTGGCCGAGAT<br>REV: CGAAGGGGAGGGAGATTTTA         | FWD: GCTGACTTGTGGCCGAGAT                              |      |
|                         |    | Exon 10   | FWD: TCAGCTGTCAATCACTTTGGA<br>REV: TGGGGGAACCTTTCATTTTGA      | FWD: TCAGCTGTCAATCACTTTGGA                            |      |
|                         |    | Exon 11   | FWD: GAGCATATTCCTCATTATGATCTTG<br>REV: TCCAGGCATTGCAATATAAGTG | FWD: GAGCATATTCCTCATTATGATCTTG                        |      |
|                         |    | Exon 12   | FWD: TGAAAAGCCTAACCTATCACATCA<br>REV: CGAAGACTCCTCCTAATTCCTC  | FWD: TGAAAAGCCTAACCTATCACATCA                         |      |
|                         |    | Exon 13_1 | FWD: TTGGATAGCCCACATGTTCA<br>REV: CAGGCTCTCTCCACAAATCC        | FWD: TTGGATAGCCCACATGTTCA                             |      |
|                         |    | Exon 13_2 | FWD: GCAACCAACTCGAAAACCAT<br>REV: AAAATCCTTCCCCAAACCT         | FWD: GCAACCAACTCGAAAACCAT                             |      |
|                         |    | Exon 14   | FWD: TTGCTCCCTTCATTTGAAAAGTT<br>REV: TGTTAGATCTGAGAGTGGAAGGAA | FWD: TTGCTCCCTTCATTTGAAAAGTT                          |      |
|                         |    | Exon 15   | FWD: GCATGGAGCTGCATACTGAT<br>REV: ATGCTTTCCAACCATTTGTC        | FWD: GCATGGAGCTGCATACTGAT                             |      |
|                         |    | Exon 16   | FWD: AACAAGGTGACCGACTCTGC<br>REV: GATCTGCTCTTGAGGTTGCAT       | FWD: AACAAGGTGACCGACTCTGC                             |      |
|                         |    | Exon 17   | FWD: TTCCTTGTTCCGTCTCCAG<br>REV: TCTGGAGCTTGAGAGAGATCG        | FWD: TTCCTTGTTCCGTCTCCAG                              |      |
|                         |    | Exon 18   | FWD: TCTGGACTTCAGCGGTCAC<br>REV: CACAACCACACTGGCTAAA          | FWD: TCTGGACTTCAGCGGTCAC                              |      |
|                         |    | Exon 19   | FWD: GTTGCTTCAAAAAGCGACTCC                                    | FWD: GTTGCTTCAAAAAGCGACTCC                            |      |

|                         |    |         |                                                             |                             |  |
|-------------------------|----|---------|-------------------------------------------------------------|-----------------------------|--|
|                         |    |         | REV: AGGCACGGACAATAAGCATC                                   |                             |  |
|                         |    | Exon 20 | FWD: TTCACATAAGACACCCAAATGC<br>REV: TTGGACTTCTCTTTGGATAGAAG | FWD: TTCACATAAGACACCCAAATGC |  |
|                         |    | Exon 21 | FWD: AGCCCCCAGAACTTATGGTT<br>REV: CCAATGTGATTGAGCAGACC      | FWD: AGCCCCCAGAACTTATGGTT   |  |
|                         |    | Exon 22 | FWD: GCCTGTTCTTTTGTGGCATC<br>REV: TGCATCTGCAAAAAGTTTCTCT    | FWD: GCCTGTTCTTTTGTGGCATC   |  |
|                         |    | Exon 23 | FWD: TGTGCGTGGTGTGTATCTGA<br>REV: TGTAGGAAGCATGAAGGTTGG     | FWD: TGTGCGTGGTGTGTATCTGA   |  |
|                         |    | Exon 24 | FWD: TGGACCACTTTGAGTGTGCT<br>REV: TCTGCCATTTAAGCCTCTCG      | FWD: TGGACCACTTTGAGTGTGCT   |  |
|                         |    | Exon 25 | FWD: CCGGAGTGTCTGTTCTTTG<br>REV: AGGCAGAGGTGATGATGGAC       | FWD: CCGGAGTGTCTGTTCTTTG    |  |
|                         |    | Exon 26 | FWD: TTTGCTCACTCCTGTGTCC<br>REV: TTCATGCAGTCGGTCAAGAG       | FWD: TTTGCTCACTCCTGTGTCC    |  |
|                         |    |         |                                                             |                             |  |
| <i>ANKS1B isoform b</i> | 13 | Exon 1  | FWD: GCATGGAGCTGCATACTGAT<br>REV: ATGCTTTCCAACCATTGTCC      | FWD: GCATGGAGCTGCATACTGAT   |  |
|                         |    | Exon 2  | FWD: AACAAAGGTGACCGACTCTGC<br>REV: GATCTGCTCTTGAGGTTGCAT    | FWD: AACAAAGGTGACCGACTCTGC  |  |
|                         |    | Exon 3  | FWD: TTCCTTGTTTCCGTCTCCAG<br>REV: TCTGGAGCTTGAGAGAGATCG     | FWD: TTCCTTGTTTCCGTCTCCAG   |  |
|                         |    | Exon 4  | FWD: TCTGGACTTCAGCGGTCAC<br>REV: CACAACCACACTGGCTAAA        | FWD: TCTGGACTTCAGCGGTCAC    |  |
|                         |    | Exon 5  | FWD: TTCACATAAGACACCCAAATGC<br>REV: TTGGACTTCTCTTTGGATAGAAG | FWD: TTCACATAAGACACCCAAATGC |  |
|                         |    | Exon 6  | FWD: CCTTCCTGGATGCTACCTTG<br>REV: CATTGCCAGGACACAGTACC      | FWD: CCTTCCTGGATGCTACCTTG   |  |
|                         |    | Exon 7  | FWD: TTCACATAAGACACCCAAATGC<br>REV: TTGGACTTCTCTTTGGATAGAAG | FWD: TTCACATAAGACACCCAAATGC |  |
|                         |    | Exon 8  | FWD: TCACTTTCAATGCTTGGTCTG<br>REV: ACTCAAAATCCAAAAGAAAAGTGT | FWD: TCACTTTCAATGCTTGGTCTG  |  |
|                         |    | Exon 9  | FWD: GCCTGTTCTTTTGTGGCATC<br>REV: TGCATCTGCAAAAAGTTTCTCT    | FWD: GCCTGTTCTTTTGTGGCATC   |  |
|                         |    | Exon 10 | FWD: TGTGCGTGGTGTGTATCTGA<br>REV: TGTAGGAAGCATGAAGGTTGG     | FWD: TGTGCGTGGTGTGTATCTGA   |  |
|                         |    | Exon 11 | FWD: TGGACCACTTTGAGTGTGCT<br>REV: TCTGCCATTTAAGCCTCTCG      | FWD: TGGACCACTTTGAGTGTGCT   |  |
|                         |    | Exon 12 | FWD: CCGGAGTGTCTGTTCTTTG<br>REV: AGGCAGAGGTGATGATGGAC       | FWD: CCGGAGTGTCTGTTCTTTG    |  |
|                         |    | Exon 13 | FWD: CGGTATGCGGTAATGTGTG<br>REV: GGGCGGAGTCATCAGAAATA       | FWD: CGGTATGCGGTAATGTGTG    |  |
|                         |    |         |                                                             |                             |  |
| <i>ANKS1B isoform c</i> | 11 | Exon 1  | FWD: TGTGGAGCTAGGATCAAGTCA<br>REV: TAAGGGCATCCAATTTTCCA     | FWD: TGTGGAGCTAGGATCAAGTCA  |  |

|                 |    |          |                                                             |                                                          |      |
|-----------------|----|----------|-------------------------------------------------------------|----------------------------------------------------------|------|
|                 |    | Exon 2   | FWD: AACAAAGGTGACCGACTCTGC<br>REV: GATCTGCTCTTGAGGTTGCAT    | FWD: AACAAAGGTGACCGACTCTGC                               |      |
|                 |    | Exon 3   | FWD: TTCCTTGTTTCCGTCCTCCAG<br>REV: TCTGGAGCTTGAGAGAGATCG    | FWD: TTCCTTGTTTCCGTCCTCCAG<br>REV: TCTGGAGCTTGAGAGAGATCG |      |
|                 |    | Exon 4   | FWD: TCTGGACTTCAGCGGTCAC<br>REV: CACAACCACACCTGGCTAAA       | FWD: TCTGGACTTCAGCGGTCAC                                 |      |
|                 |    | Exon 5   | FWD: TTCACATAAGACACCCAAATGC<br>REV: TTGGACTTCTCTTTGGATAGAAG | FWD: TTCACATAAGACACCCAAATGC                              |      |
|                 |    | Exon 6   | FWD: AGCCCCCAGAACTTATGGTT<br>REV: CCAATGTGATTGAGCAGACC      | FWD: AGCCCCCAGAACTTATGGTT                                |      |
|                 |    | Exon 7   | FWD: GCCTGTTCTTTTGTGGCATC<br>REV: TGCATCTGCAAAAAGTTTCTCT    | FWD: GCCTGTTCTTTTGTGGCATC                                |      |
|                 |    | Exon 8   | FWD: TGTGCGTGGTGTGTATCTGA<br>REV: TGTAGGAAGCATGAAGGTTGG     | FWD: TGTGCGTGGTGTGTATCTGA<br>REV: TGTAGGAAGCATGAAGGTTGG  |      |
|                 |    | Exon 9   | FWD: TGGACCACTTTGAGTGTGCT<br>REV: TCTGCCATTTAAGCCTCTCG      | FWD: TGGACCACTTTGAGTGTGCT                                |      |
|                 |    | Exon 10  | FWD: CCGGAGTGTCTGTCTTTG<br>REV: AGGCAGAGGTGATGATGGAC        | FWD: CCGGAGTGTCTGTCTTTG                                  |      |
|                 |    | Exon 11  | FWD: TTTGCTCACTCCTGTGTTC<br>REV: TTCATGCAGTCGGTCAAGAG       | FWD: TTTGCTCACTCCTGTGTTC                                 |      |
|                 |    |          |                                                             |                                                          |      |
| <i>FAM71C</i>   | 2  | 5'UTR    | FWD: GGTAGTGGTCTGCTGAGCTGT<br>REV: CGTGTCTGCAGGCTTCTT       | FWD: GGTAGTGGTCTGCTGAGCTGT                               |      |
|                 |    | Exon 1_1 | FWD: ACCTGTGCTCCTGACAGCTC<br>REV: GAACGATGCCATTGTTACC       | FWD: ACCTGTGCTCCTGACAGCTC                                |      |
|                 |    | Exon 1_2 | FWD: GCAGCGGCAACTGTACAAAG<br>REV: GCATCCGATGGAGGACAC        | FWD: GCAGCGGCAACTGTACAAAG                                |      |
|                 |    | Exon 1_3 | FWD: CTGCCACCCAGAAAAGAGAA<br>REV: AAGTTCATTTGGCCTCAGA       | FWD: CTGCCACCCAGAAAAGAGAA                                |      |
|                 |    | Exon 2   | FWD: TCCCTGCAATTGCCACTTAT<br>REV: ATGGTACCTGTGGTGGTGCT      | FWD: TCCCTGCAATTGCCACTTAT                                |      |
|                 |    | 3'UTR    | FWD: TGAAATGTTTGGGTCCACCT<br>REV: CCCAATGCTGAGTAGCAGAG      | FWD: TGAAATGTTTGGGTCCACCT                                |      |
|                 |    |          |                                                             |                                                          |      |
| <i>KIAA0701</i> | 13 | Exon 1   | FWD: GCCAATGCCACAAACCTC<br>REV: CGGGGAAGTCCGAAGGTC          | FWD: GCCAATGCCACAAACCTC                                  | Fail |
|                 |    | Exon 2   | FWD: GGACATTATGTTGTGTCCACTCC<br>REV: GGCACACATTTATGCAAAGG   | FWD: GGACATTATGTTGTGTCCACTCC                             |      |
|                 |    | Exon 3   | FWD: TGGGTACATCTGGTTTCAAAG<br>REV: AAAGGATGAAAAACCTGAGTCC   | FWD: TGGGTACATCTGGTTTCAAAG                               |      |
|                 |    | Exon 4   | FWD: GGCACCTTAAATGACTCTGCTCA<br>REV: TTGTAAAATGTTGATGGGAGA  | FWD: GGCACCTTAAATGACTCTGCTCA                             |      |
|                 |    | Exon 5   | FWD: AGTGATCTGCCTGCCTCAG<br>REV: GAGGTCAAGGCTGCAGTGAG       | FWD: AGTGATCTGCCTGCCTCAG                                 | Fail |
|                 |    | Exon 6   | FWD: TTGAATTTGATGGAATAATGCAA                                | FWD: TTGAATTTGATGGAATAATGCAA                             |      |

|                 |    |         |                                                             |                                                         |      |
|-----------------|----|---------|-------------------------------------------------------------|---------------------------------------------------------|------|
|                 |    |         | REV: GCATTATTTTAATATGCCACTGGT                               |                                                         |      |
|                 |    | Exon 7  | FWD: GCCCGGCCAGTAAATACTTC<br>REV: TGCCTAATACAGAGCTCTAAACAGA | FWD: GCCCGGCCAGTAAATACTTC                               |      |
|                 |    | Exon 8  | FWD: GGCATGAGCCTAGTTTTACCG<br>REV: ATGCTTCCAGTTGTGCCTTT     | FWD: GGCATGAGCCTAGTTTTACCG                              |      |
|                 |    | Exon 9  | FWD: AAAATCCTTAATGTGCCGTCAT<br>REV: TGCCAGGAGAAAAATACCAA    | FWD: AAAATCCTTAATGTGCCGTCAT                             |      |
|                 |    | Exon 10 | FWD: TTCGAAATTACATGTAGGTGAAGC<br>REV: GCAAGACCCCATCTCTACA   | FWD: TTCGAAATTACATGTAGGTGAAGC                           |      |
|                 |    | Exon 11 | FWD: CAAGAGTCCCATTCCAGAGTTT<br>REV: TGGCCATTTCATAAACCTTGT   | FWD: CAAGAGTCCCATTCCAGAGTTT                             |      |
|                 |    | Exon 12 | FWD: GGGTGTTTAAAAATAATTCCATGTG<br>REV: GGCTTGAGCCTAGGAGTTTG | FWD: GGGTGTTTAAAAATAATTCCATGTG                          |      |
|                 |    | Exon 13 | FWD: TGGCATTTAATCCTATCTTCATGT<br>REV: CTCCAGTGATGGGTGCAG    | FWD: TGGCATTTAATCCTATCTTCATGT                           |      |
|                 |    |         |                                                             |                                                         |      |
| <i>GOLGA2L1</i> | 4  | 5'UTR 1 | FWD: GAGCAGCTTTCCTTGTGAGG<br>REV: GGGCTGGCTGACAAGATTT       | FWD: GAGCAGCTTTCCTTGTGAGG                               |      |
|                 |    | 5'UTR 2 | FWD: ACCCCATCCCCATAAGGTC<br>REV: TCAGCTTCTCTGATACAAGGATTT   | FWD: ACCCCATCCCCATAAGGTC                                |      |
|                 |    | 5'UTR 3 | FWD: TGCAGCATTATTGGCACAAG<br>REV: GGCTGAGAAGGAGGTGTCTG      | FWD: TGCAGCATTATTGGCACAAG<br>REV: GGCTGAGAAGGAGGTGTCTG  | Fail |
|                 |    | 5'UTR 4 | FWD: AGCCATATGGAAGGGTGTGT<br>REV: CCCACATTCCCATGTTATT       | FWD: AGCCATATGGAAGGGTGTGT                               |      |
|                 |    | 5'UTR 5 | FWD: GCAGTCATTTAGGCCTGGAG<br>REV: AGGCTGCTGGTCTGCTG         | FWD: GCAGTCATTTAGGCCTGGAG                               | Fail |
|                 |    | 5'UTR 6 | FWD: AGCAGCAGAAAGCTCAAAGC<br>REV: GCTCCCAGAAAGGTCACCATA     | FWD: AGCAGCAGAAAGCTCAAAGC                               |      |
|                 |    | Exon 1  | FWD: CCAGCCTGGATGATAGAATGA<br>REV: GGTGAAATGGTGTCTGACCA     | FWD: CCAGCCTGGATGATAGAATGA<br>REV: GGTGAAATGGTGTCTGACCA | Fail |
|                 |    | Exon 2  | FWD: AGCCAGTGGTCAGACACCAT<br>REV: TTCCTCAACCCTCTCCTTCA      | FWD: AGCCAGTGGTCAGACACCAT<br>REV: TTCCTCAACCCTCTCCTTCA  | Fail |
|                 |    | Exon 3  | FWD: TGCTGCATCTAGCTGTCTGG<br>REV: CACTTGTTCAGTCGTCCAC       | FWD: TGCTGCATCTAGCTGTCTGG<br>REV: CACTTGTTCAGTCGTCCAC   | Fail |
|                 |    | Exon 4  | FWD: CAGGACAAGGGAGAGGTGAA<br>REV: CTCCTGGAGGTTCTGCATCT      | FWD: CAGGACAAGGGAGAGGTGAA                               |      |
|                 |    | 3'UTR   | FWD: GGAGTCTGCACAAGGAGAGG<br>REV: TGTCTGGCTTCATAACTTCTCA    | FWD: GGAGTCTGCACAAGGAGAGG                               |      |
|                 |    |         |                                                             |                                                         |      |
| <i>ACTR6</i>    | 11 | Exon 1  | FWD: AAGCACAGCCCCTAACATTC<br>REV: GGAATCCCTCTGGCTAAGT       | FWD: AAGCACAGCCCCTAACATTC                               |      |
|                 |    | Exon 2  | FWD: ATCATCCTGCTCCCAAAGTG<br>REV: TGGTCGTTTATTTTACCCTAAA    | FWD: ATCATCCTGCTCCCAAAGTG                               |      |
|                 |    | Exon 3  | FWD: ACAGCATTACACTGGAAATGG<br>REV: TCAACCTCTACTTCAACATGGAAA | FWD: ACAGCATTACACTGGAAATGG                              | Fail |

|               |    |            |                                                                 |                                                               |      |
|---------------|----|------------|-----------------------------------------------------------------|---------------------------------------------------------------|------|
|               |    | Exon 4     | FWD: TCCCTGGATTCAAATCTTACC<br>REV: AAGTGATCTACTCGCCTCAGC        | FWD: TCCCTGGATTCAAATCTTACC                                    | Fail |
|               |    | Exon 5 & 6 | FWD: GGGAACATTTTTGTCTTGGTG<br>REV: GCGTGAGTACAATGACTGG          | FWD: GGGAACATTTTTGTCTTGGTG                                    |      |
|               |    | Exon 7     | FWD: CCCTCAGAGGAATAGTGTGGA<br>REV: TTGTAAGTCAAGTCAGGCAAGACA     | FWD: CCCTCAGAGGAATAGTGTGGA                                    |      |
|               |    | Exon 8     | FWD: GGCAGCTACATGTTATGGATGA<br>REV: TAGAGACAGGGGCTTGCTTT        | FWD: GGCAGCTACATGTTATGGATGA                                   |      |
|               |    | Exon 9     | FWD: CAACAGTAAAGGCAGCCACA<br>REV: TGGGATCTACAAATCTCTGCAA        | FWD: CAACAGTAAAGGCAGCCACA                                     |      |
|               |    | Exon 10    | FWD: AAATTTATTTGGTTTCCCACCA<br>REV: GAATATTCAGCAGGTGAAATGAA     | FWD: AAATTTATTTGGTTTCCCACCA                                   |      |
|               |    | Exon 11    | FWD: TGCCACATTTAATGGCAA<br>REV: GCCGTTAAATTTGTGCTTTCA           | FWD: TGCCACATTTAATGGCAA                                       |      |
|               |    | 3'UTR      | FWD: TCCACATTTTCATTTAGGAGCTA<br>REV: TTCAAATCTCTTTTCATTCATCC    | FWD: TCCACATTTTCATTTAGGAGCTA                                  |      |
|               |    |            |                                                                 |                                                               |      |
| <i>DEPDC4</i> | 5  | Exon 1     | FWD: AAGGGAGGGGGAAAAAGACT<br>REV: CCCCTAAAAAGCCTCAGTCC          | FWD: AAGGGAGGGGGAAAAAGACT<br>REV: CCCCTAAAAAGCCTCAGTCC        | Fail |
|               |    | Exon 2_1   | FWD: TGTGAGATGACACGTAAGAAGGA<br>REV: TTTTGTCTTTTGCAACAATCG      | TGTGAGATGACACGTAAGAAGGA                                       |      |
|               |    | Exon 2_2   | FWD: TCTTAAAGGGGTTTCATCTTTGC<br>REV: CACATTCGAGTTTAGCTCAATAAA   | FWD: TCTTAAAGGGGTTTCATCTTTGC<br>REV: CACATTCGAGTTTAGCTCAATAAA |      |
|               |    | Exon 3     | FWD: GCCTGAAATCGTTTTGGAA<br>REV: CAAGGGGTATGTGGGAACCTG          | FWD: GCCTGAAATCGTTTTGGAA                                      |      |
|               |    | Exon 4     | FWD: AATATGGCTCATAACTCTGATGTTT<br>REV: TCGTACGAACCAACCCTCT      | FWD: AATATGGCTCATAACTCTGATGTTT                                |      |
|               |    | Exon 5     | FWD: GAAAAGAACCTGCAAATAATACAA<br>REV: GGCAAAATGCCAGAGATACC      | FWD: GAAAAGAACCTGCAAATAATACAA                                 |      |
|               |    |            |                                                                 |                                                               |      |
| <i>SCYL2</i>  | 17 | 5'UTR      | FWD: AGTCCTCGAAAGAGGCCTTG<br>REV: CCCACCTCACACACAATAACC         | FWD: AGTCCTCGAAAGAGGCCTTG<br>REV: CCCACCTCACACACAATAACC       | Fail |
|               |    | Exon 1     | FWD: GGTTCTCTGAAGATAAAACCAACA<br>REV: TGAGAACTAAAGAACCCATTTAAGA | FWD: GGTTCTCTGAAGATAAAACCAACA                                 |      |
|               |    | Exon 2     | FWD: TCATAAGGAAACCAACTCTTTGA<br>REV: TGCAAATAAATTTAGGGAGAAAAC   | FWD: TCATAAGGAAACCAACTCTTTGA                                  |      |
|               |    | Exon 3     | FWD: TGCAGAGGCTCCTAACTTTG<br>REV: CCGAACAACAACTGCAGAA           | FWD: TGCAGAGGCTCCTAACTTTG                                     |      |
|               |    | Exon 4     | FWD: TGGCAATTGACTACATCTGTG<br>REV: TGTGGTAGTAATGTGCCGAAG        | FWD: TGGCAATTGACTACATCTGTG                                    |      |
|               |    | Exon 5     | FWD: TTGGGAATTTGGGAATTTTG<br>REV: GCTGATCTTATGCAAACCTAAAATG     | FWD: TTGGGAATTTGGGAATTTTG                                     |      |
|               |    | Exon 6     | FWD: TTGGGTATTAAGATAAGGGTTTTG<br>REV: TTTGGGGCTGTATCTGACTG      | FWD: TTGGGTATTAAGATAAGGGTTTTG                                 |      |
|               |    | Exon 7     | FWD: AGGTGATCTTCAGCATTTTGC                                      | FWD: AGGTGATCTTCAGCATTTTGC                                    |      |

|                |    |           |                                                              |                                                            |      |
|----------------|----|-----------|--------------------------------------------------------------|------------------------------------------------------------|------|
|                |    |           | REV: TTTTGGCTTCAGTTGGCAGT                                    |                                                            |      |
|                |    | Exon 8    | FWD: GCATCCCACCTTTACTCTGAAAA<br>REV: TTTGGTTCAAACATGTAAAGCAG | FWD: GCATCCCACCTTTACTCTGAAAA                               |      |
|                |    | Exon 9    | FWD: CAGGCTAGCAACATGGTGAG<br>REV: TGCAGGTATTATGTACACAGACTGA  | FWD: CAGGCTAGCAACATGGTGAG                                  |      |
|                |    | Exon 10   | FWD: CAAAGAGTTGTTGAAAGGACCA<br>REV: GCACTCAAAGTAAAGGGACAGC   | FWD: CAAAGAGTTGTTGAAAGGACCA                                |      |
|                |    | Exon 11   | FWD: TTGTGAAACAAGCCAGGAAA<br>REV: TGTCAAGATTCTACTGCTTTTGCTA  | FWD: TTGTGAAACAAGCCAGGAAA                                  |      |
|                |    | Exon 12   | FWD: AGGCATTGATTGGGAAAAAC<br>REV: CCTTCCACCCACAAACTTTC       | FWD: AGGCATTGATTGGGAAAAAC                                  |      |
|                |    | Exon 13   | FWD: ATATCAGCGCTGTGACTGGA<br>REV: TTGAAATGTTTACATGTGGTCAA    | FWD: ATATCAGCGCTGTGACTGGA                                  |      |
|                |    | Exon 14   | FWD: GGGGCAAGCAGACATTAACA<br>REV: CAGTCAGAAGGTCTGTCCCA       | FWD: GGGGCAAGCAGACATTAACA                                  |      |
|                |    | Exon 15   | FWD: TTGGGAATCAGGTAAGAAGCA<br>REV: TCTCAAAATGGGTTAGGGTCA     | FWD: TTGGGAATCAGGTAAGAAGCA                                 |      |
|                |    | Exon 16   | FWD: TGTGACAATCACCAAGACAAGA<br>REV: TGCCCATACTTCTTAGAAACCA   | FWD: TGTGACAATCACCAAGACAAGA                                |      |
|                |    | Exon 17_1 | FWD: TTGACCGGCAGGCTATAGTT<br>REV: GCAGGAGGAACACTCAAAGC       | FWD: TTGACCGGCAGGCTATAGTT                                  |      |
|                |    | Exon 17_2 | FWD: GGGCTTTCAGACTTCAGGAT<br>REV: TTGAAACTGAAATAATCCTTCAAA   | FWD: GGGCTTTCAGACTTCAGGAT<br>REV: TTGAAACTGAAATAATCCTTCAAA | Fail |
|                |    | Exon 17_3 | FWD: TGCTTTTGGTATGCAGGGTA<br>REV: GAGCTTGCAATGACCATCAC       | FWD: TGCTTTTGGTATGCAGGGTA                                  |      |
|                |    |           |                                                              |                                                            |      |
| <i>SLC17A8</i> | 12 | 5'UTR 1   | FWD: GATCTGAAACCTGGCTCTGC<br>REV: CTGCCTGGGTAACCTCTCTGC      | FWD: GATCTGAAACCTGGCTCTGC                                  |      |
|                |    | 5'UTR 2   | FWD: GATTTGGAGGCACAGAGGAG<br>REV: TAGATGCCATTTGGGACCAT       | FWD: GATTTGGAGGCACAGAGGAG                                  |      |
|                |    | 5'UTR 3   | FWD: AGAGGGAGAAAAAGGGGAAAA<br>REV: CAGTATCCGTGGCCTAGCTC      | FWD: AGAGGGAGAAAAAGGGGAAAA                                 |      |
|                |    | 5'UTR 4   | FWD: TCAGAAAAGCAAAGGGCTGT<br>REV: CTCCTTCCTTCCCAGGTTTC       | FWD: TCAGAAAAGCAAAGGGCTGT                                  |      |
|                |    | Exon 1    | FWD: TCCCTCCACGAGAACTGACT<br>REV: AGGGGCTCCAGAAGGATCTA       | FWD: TCCCTCCACGAGAACTGACT                                  |      |
|                |    | Exon 2    | FWD: TGGGTCTTCTTTTTGTTTTTC<br>REV: AATGGGAGGATGCTGAGATG      | FWD: TGGGTCTTCTTTTTGTTTTTC                                 |      |
|                |    | Exon 3    | FWD: CAGGACTTTTGCTTGCTGCT<br>REV: CAGGGTCATTGGGATCAGT        | FWD: CAGGACTTTTGCTTGCTGCT                                  |      |
|                |    | Exon 4    | FWD: TCTTTCCACAGGATTTCCA<br>REV: GGAAACAGCAGGAAAAGGAA        | FWD: TCTTTCCACAGGATTTCCA                                   |      |
|                |    | Exon 5    | FWD: TCACTTCCCAAAGGTCCATC<br>REV: GGCTCCAGGATCCTCCT          | FWD: TCACTTCCCAAAGGTCCATC                                  |      |
|                |    | Exon 6    | FWD: ACACTGGGAGTTTGCTGTGTC                                   | FWD: ACACTGGGAGTTTGCTGTGTC                                 |      |

|              |   |           |                                                               |                                |  |
|--------------|---|-----------|---------------------------------------------------------------|--------------------------------|--|
|              |   |           | REV: TGACGTTCTCTTGTTAACTGGT                                   |                                |  |
|              |   | Exon 7    | FWD: GGGTGTTACAGTGCATGTAT<br>REV: GCATAAACCCGGCAAAGATGT       | FWD: GGGTGTTACAGTGCATGTAT      |  |
|              |   | Exon 8    | FWD: GGGCCAACGTGGTTAGTCT<br>REV: CAGCCAGGCTATTAGGTGTCA        | FWD: GGGCCAACGTGGTTAGTCT       |  |
|              |   | Exon 9    | FWD: CCTACCCAGTCCCACATAA<br>REV: GCAGCACTGTGATGGACAAC         | FWD: CCTACCCAGTCCCACATAA       |  |
|              |   | Exon 10   | FWD: GGGCCCAAACCTAGATGAT<br>REV: ACATTCTCTGGACGGTGGTC         | FWD: GGGCCCAAACCTAGATGAT       |  |
|              |   | Exon 11   | FWD: GTGCAGACACAGCCTCTTGA<br>REV: CTAGCCTTGGTGCCATTGAT        | FWD: GTGCAGACACAGCCTCTTGA      |  |
|              |   | Exon 12_1 | FWD: TGCTTCTGACACACGTCCCTC<br>REV: TCGCTCCTCTCTGTCCCTTC       | FWD: TGCTTCTGACACACGTCCCTC     |  |
|              |   | Exon 12_2 | FWD: CCTGGTGCATTACAGTGGTG<br>REV: TCTTTCCCTGTTGCTGGTT         | FWD: CCTGGTGCATTACAGTGGTG      |  |
|              |   | 3'UTR 1   | FWD: TTTCTTGTAGCCCAGCTTGC<br>REV: CCTTGGGCAAGTTCATTCT         | FWD: TTTCTTGTAGCCCAGCTTGC      |  |
|              |   | 3'UTR 2   | FWD: ATGTTTGGCCAGAAGGAATG<br>REV: CCAATCTCTTGTTACTGCTTICA     | FWD: ATGTTTGGCCAGAAGGAATG      |  |
|              |   | 3'UTR 3   | FWD: GGGAAACATTTGGGTTGATG<br>REV: AAGTATCCAATGTAATTGCCATTATGC | FWD: GGGAAACATTTGGGTTGATG      |  |
|              |   | 3'UTR 4   | FWD: TCTTTAGCCTTTTCTGCTGGA<br>REV: CTGTTTATGGGGCTTGCAT        | FWD: TCTTTAGCCTTTTCTGCTGGA     |  |
|              |   | 3'UTR 5   | FWD: TGTATTTCTGGTCCCCAGTGA<br>REV: CGTGGGTTTCTGCATATGAT       | FWD: TGTATTTCTGGTCCCCAGTGA     |  |
|              |   |           |                                                               |                                |  |
| <i>NR1H4</i> | 9 | 5'UTR 1   | FWD: TCCCAAGGTTCTTTCTATGT<br>REV: TCATTAACCTTTTGCTTCTGCTTC    | FWD: TCCCAAGGTTCTTTCTATGT      |  |
|              |   | 5'UTR 2   | FWD: CCTTGGTGGAGACAGAAAAA<br>REV: CCTTGTATCTGCCTTTTAGAGGA     | FWD: CCTTGGTGGAGACAGAAAAA      |  |
|              |   | Exon 1    | FWD: CTTGGGCATTTTtaggtcca<br>REV: TCCGATCTACCTCTAACCTTGC      | FWD: CTTGGGCATTTTtaggtcca      |  |
|              |   | Exon 2    | FWD: AGAGCCCACACTCCTAACCA<br>REV: GGTGAGGATGTAGGAGGAGGT       | FWD: AGAGCCCACACTCCTAACCA      |  |
|              |   | Exon 3    | FWD: GATGGCCTGGGTGCTCTC<br>REV: GATGGCTTAGTAGGTTCTTCTTT       | FWD: GATGGCCTGGGTGCTCTC        |  |
|              |   | Exon 4    | FWD: AAGGCTAGCGTTAGTTCTGTGC<br>REV: TCCATTTTAATGAACAATTGGACT  | FWD: AAGGCTAGCGTTAGTTCTGTGC    |  |
|              |   | Exon 5    | FWD: AGGTCCCTCCAGATGAATGC<br>REV: TCAGATCTTTGGAGGGCAAT        | FWD: AGGTCCCTCCAGATGAATGC      |  |
|              |   | Exon 6    | FWD: ATTGCCCTCCAAAGATCTGA<br>REV: GAAAAATAGAGCTGATCTCACAGGAA  | FWD: ATTGCCCTCCAAAGATCTGA      |  |
|              |   | Exon 7    | FWD: GGACTCAACTAGACTACCCAATTTT<br>REV: TTCATGCTAGGCACAACAGG   | FWD: GGACTCAACTAGACTACCCAATTTT |  |
|              |   | Exon 8    | FWD: CAATGTCCTTCCTTTGGACA                                     | FWD: CAATGTCCTTCCTTTGGACA      |  |

|               |   |           |                                                              |                                                        |      |
|---------------|---|-----------|--------------------------------------------------------------|--------------------------------------------------------|------|
|               |   |           | REV: TGAAAAGAAGTGCCTGAAAGGT                                  |                                                        |      |
|               |   | Exon 9    | FWD: CGTGTGTGTGCATAAAAAATTCA<br>REV: TGAGTGAAACTGGGTACAAGTGA | FWD: CGTGTGTGTGCATAAAAAATTCA                           |      |
|               |   | 3'UTR     | FWD: CGACCACAAGTTTACCCCACT<br>REV: GATTCAATAGGATGTCTTTCAACA  | FWD: CGACCACAAGTTTACCCCACT                             |      |
|               |   |           |                                                              |                                                        |      |
| <i>PIGAP</i>  | 1 | Exon 1_1  | FWD: CCATTTGATGAGGAGGAGGA<br>REV: GCTTTCCACACCTCCCATATT      | FWD: CCATTTGATGAGGAGGAGGA                              |      |
|               |   | Exon 1_2  | FWD: ACCATCTCAGCATGGCGTAT<br>REV: AATCCAGAAAAGGGGATGGTC      | FWD: ACCATCTCAGCATGGCGTAT                              |      |
|               |   | Exon 1_3  | FWD: TTCACAGTCTGCCATTGCTC<br>REV: TTCTCTTGGTCCCTCTCCCTC      | FWD: TTCACAGTCTGCCATTGCTC                              |      |
|               |   | Exon 1_4  | FWD: AGACCCATTTAGAAGGCATGA<br>REV: TGTCCAGTTGTTTGCCATTG      | FWD: AGACCCATTTAGAAGGCATGA                             |      |
|               |   | Exon 1_5  | FWD: TGTGAGGGATTGAAAAAGC<br>REV: TGCAAGGTTTCTACACTCAGGA      | FWD: TGTGAGGGATTGAAAAAGC                               |      |
|               |   | Exon 1_6  | FWD: TTTGGGGGCTTGTGTTTTT<br>REV: TGTGCTGGTAACTGATGGACT       | FWD: TTTGGGGGCTTGTGTTTTT                               |      |
|               |   | Exon 1_7  | FWD: TGGCCAGTTTTTAATGTTATGC<br>REV: CTGCTCAGAAAACCGAAGG      | FWD: TGGCCAGTTTTTAATGTTATGC                            |      |
|               |   | Exon 1_8  | FWD: GCCTTCATCTTCCATTGTGTT<br>REV: TCTAGTGCACCCACAAGTGC      | FWD: GCCTTCATCTTCCATTGTGTT                             |      |
|               |   | Exon 1_9  | FWD: TAATTGTTGTGCCAGAGC<br>REV: AAAAACGGTGGTATGCCTTT         | FWD: TAATTGTTGTGCCAGAGC                                |      |
|               |   | Exon 1_10 | FWD: GGGAGTTCCTTTGTTGGAGAAA<br>REV: CTCCTTTTTTCAGACTCAGTCCA  | FWD: GGGAGTTCCTTTGTTGGAGAAA                            |      |
|               |   |           |                                                              |                                                        |      |
| <i>GAS2L3</i> | 8 | 5'UTR 1   | FWD: GGACCTGCTCTGACTGAACC<br>REV: GAGACCCAACAAACCTCAGC       | FWD: GGACCTGCTCTGACTGAACC<br>REV: GAGACCCAACAAACCTCAGC | Fail |
|               |   | 5'UTR 2   | FWD: AAGCAGCTTTCCAAATTATGC<br>REV: GCGGTAAGAACAAAGGTGTTA     | FWD: AAGCAGCTTTCCAAATTATGC                             |      |
|               |   | Exon 1    | FWD: GAAGAAAAAGTTTTGCGTTTGC<br>REV: GCTTAGAATTGAACGTTTTTGA   | FWD: GAAGAAAAAGTTTTGCGTTTGC                            |      |
|               |   | Exon 2    | FWD: TGAGCCACAGCAGCTTTTTA<br>REV: TCCCCAGCTGAAATGTAACC       | FWD: TGAGCCACAGCAGCTTTTTA                              |      |
|               |   | Exon 3    | FWD: AAGTTAACTGGCCATTATTTGCT<br>REV: TTCACCATTTAATTGATTGAAC  | FWD: AAGTTAACTGGCCATTATTTGCT                           |      |
|               |   | Exon 4    | FWD: GGTGGGGACCTCTGCTTTA<br>REV: TCCAGAACCTTCTGTAGCC         | FWD: GGTGGGGACCTCTGCTTTA                               |      |
|               |   | Exon 5    | FWD: TTTTCTAAACAAGTAAACCTGCTG<br>REV: TGCTCATGCAAACAGAATGA   | FWD: TTTTCTAAACAAGTAAACCTGCTG                          |      |
|               |   | Exon 6    | FWD: CCCAGTGAACAATTGGTAGAA<br>REV: CCCACCACTCCTCAACTAC       | FWD: CCCAGTGAACAATTGGTAGAA                             |      |
|               |   | Exon 7    | FWD: AGCACAGGAGAAGCGATTAAA<br>REV: CCTGTACAGTGAAATCCTTCCA    | FWD: AGCACAGGAGAAGCGATTAAA                             |      |

|                |  |           |                                                              |                                                              |      |
|----------------|--|-----------|--------------------------------------------------------------|--------------------------------------------------------------|------|
|                |  | Exon 10_1 | FWD: CTGTTGGCAAATGCTCTGAA<br>REV: GTGAAGATGCTGGCACCAAT       | FWD: CTGTTGGCAAATGCTCTGAA                                    |      |
|                |  | Exon 10_2 | FWD: AACACCTCAGCCTCCTGAAA<br>REV: GGGGTATTGGGGGATGAAA        | FWD: AACACCTCAGCCTCCTGAAA                                    |      |
|                |  | Exon 10_3 | FWD: CAGGCTCCTTCAAAACAATGC<br>REV: TGATTAAATTCAAGGCCGATT     | FWD: CAGGCTCCTTCAAAACAATGC                                   |      |
|                |  | Exon 10_4 | FWD: TCCAGTCCTCTGCAAAAATG<br>REV: TCATCATCTTCCTTTTCTTTGC     | FWD: TCCAGTCCTCTGCAAAAATG                                    |      |
|                |  | Exon 10_5 | FWD: CTGTCGCTAAGAGCCAGCAT<br>REV: CAGAAGGGCTCTTCCAGTG        | FWD: CTGTCGCTAAGAGCCAGCAT                                    |      |
|                |  |           |                                                              |                                                              |      |
| <i>TMEM16D</i> |  | Exon 1    | FWD: TCTTCTCGCCTTTCCTAGCC<br>REV: CCATGAAAACAGAGGAAATGC      | FWD: TCTTCTCGCCTTTCCTAGCC<br>REV: CCATGAAAACAGAGGAAATGC      |      |
|                |  | Exon 2    | FWD: GTGATGCATACCTTAAGAATTGA<br>REV: AGGTGAGCAGAAGGGGAAAT    | FWD: GTGATGCATACCTTAAGAATTGA<br>REV: AGGTGAGCAGAAGGGGAAAT    |      |
|                |  | Exon 3    | FWD: GCTTGTCACTCAAGGAGTTAATGA<br>REV: AAAACCTGTCCCTTGTTTTACA | FWD: GCTTGTCACTCAAGGAGTTAATGA<br>REV: AAAACCTGTCCCTTGTTTTACA |      |
|                |  | Exon 4    | FWD: GCTGGAACACTACAGGCACACG<br>REV: TTGGAACATTCCCCAAACTC     | FWD: GCTGGAACACTACAGGCACACG<br>REV: TTGGAACATTCCCCAAACTC     | Fail |
|                |  | Exon 5    | FWD: GTCTGGCCTATFGGTGAGGA<br>REV: TTGGCCATGAAGGCTTATTT       | FWD: GTCTGGCCTATFGGTGAGGA<br>REV: TTGGCCATGAAGGCTTATTT       |      |
|                |  | Exon 6    | FWD: GCCCTGTGTTCCCACTGTAT<br>REV: CGGAGAGGGACGTTTTTCAT       | FWD: GCCCTGTGTTCCCACTGTAT<br>REV: CGGAGAGGGACGTTTTTCAT       |      |
|                |  | Exon 7    | FWD: AGTGAGAGGGCCTGGAATG<br>REV: TAGGGGAGAAGGGCACTATG        | FWD: AGTGAGAGGGCCTGGAATG<br>REV: TAGGGGAGAAGGGCACTATG        | Fail |
|                |  | Exon 8    | FWD: TGTTCCAGACACACCCTGTC<br>REV: TGCGACGAAGATTTTACTTG       | FWD: TGTTCCAGACACACCCTGTC<br>REV: TGCGACGAAGATTTTACTTG       |      |
|                |  | Exon 9    | FWD: GTGCCCCTAAGAGGGTTGAT<br>REV: CCCTCCCTAATTACCCATTGA      | FWD: GTGCCCCTAAGAGGGTTGAT<br>REV: CCCTCCCTAATTACCCATTGA      |      |
|                |  | Exon 10   | FWD: ATCAAACCTGCCTGCCCTTA<br>REV: GCCAGATATGAGTGAGAGCTGTA    | FWD: ATCAAACCTGCCTGCCCTTA<br>REV: GCCAGATATGAGTGAGAGCTGTA    |      |
|                |  | Exon 11   | FWD: GGCTTACCTTGCTTGCAGTT<br>REV: CCATGAGAGGGTAGGAAGTTTG     | FWD: GGCTTACCTTGCTTGCAGTT<br>REV: CCATGAGAGGGTAGGAAGTTTG     |      |
|                |  | Exon 12   | FWD: TGGGCAAGAACTTGTTTACATT<br>REV: GCCATGCCTTCCAAATACAT     | FWD: TGGGCAAGAACTTGTTTACATT<br>REV: GCCATGCCTTCCAAATACAT     |      |
|                |  | Exon 13   | FWD: ATTCCCCCTACCCAAAACAA<br>REV: TGAAGGTTTAAGAGAAATCAGACA   | FWD: ATTCCCCCTACCCAAAACAA<br>REV: TGAAGGTTTAAGAGAAATCAGACA   |      |
|                |  | Exon 14   | FWD: GAAATGAAGCTCAGCTGAAAA<br>REV: GGCAATTGAAAATGCTTTATGAG   | FWD: GAAATGAAGCTCAGCTGAAAA<br>REV: GGCAATTGAAAATGCTTTATGAG   |      |
|                |  | Exon 15   | FWD: CAAACCCACTTCATTGGTTG<br>REV: TGAGGAATAAATAACAAAGTGCAAA  | FWD: CAAACCCACTTCATTGGTTG<br>REV: TGAGGAATAAATAACAAAGTGCAAA  |      |
|                |  | Exon 16   | FWD: TGCATTTGATTGTGATCTCTTG<br>REV: CTGCCAGGACATCAGTGCTA     | FWD: TGCATTTGATTGTGATCTCTTG<br>REV: CTGCCAGGACATCAGTGCTA     |      |
|                |  | Exon 17   | FWD: TCTTGCCCTGAAAATTACGC<br>REV: TTCTGTTGAAGGCAAAGAAAA      | FWD: TCTTGCCCTGAAAATTACGC<br>REV: TTCTGTTGAAGGCAAAGAAAA      |      |

|        |    |           |                                                          |                                                          |      |
|--------|----|-----------|----------------------------------------------------------|----------------------------------------------------------|------|
|        |    | Exon 18   | FWD: TCCGTGGGTAAACTGGAGTC<br>REV: TTTGGGAAGAGAAGGGAGGA   | FWD: TCCGTGGGTAAACTGGAGTC<br>REV: TTTGGGAAGAGAAGGGAGGA   |      |
|        |    | Exon 19   | FWD: TTTCTAATTCCCCAGACC<br>REV: GGCCTGCAAGTAAGCAA        | FWD: TTTCTAATTCCCCAGACC<br>REV: GGCCTGCAAGTAAGCAA        |      |
|        |    | Exon 20   | FWD: TCCCATCATTCTTGTTTCC<br>REV: TGATTTTCATGGCTGCCTTT    | FWD: TCCCATCATTCTTGTTTCC<br>REV: TGATTTTCATGGCTGCCTTT    |      |
|        |    | Exon 21   | FWD: TTCTTTGATAGCCTGCCTGAA<br>REV: ATGCCTCCTCTCTGTTGC    | FWD: TTCTTTGATAGCCTGCCTGAA<br>REV: ATGCCTCCTCTCTGTTGC    |      |
|        |    | Exon 22   | FWD: GATATCCCCTGTGCGTCTGT<br>REV: AAGCACAAATCTCTAGCACTGG | FWD: GATATCCCCTGTGCGTCTGT<br>REV: AAGCACAAATCTCTAGCACTGG |      |
|        |    | Exon 23   | FWD: TGCAAATGTCAGTATTTGGAAAG<br>REV: TCACAGGCCTCTCCTTCTG | FWD: TGCAAATGTCAGTATTTGGAAAG<br>REV: TCACAGGCCTCTCCTTCTG |      |
|        |    | Exon 24   | FWD: AAGGAAGGGCCAGTTAAAG<br>REV: GCTTGAAAATTCTTCATGTGCTT | FWD: AAGGAAGGGCCAGTTAAAG<br>REV: GCTTGAAAATTCTTCATGTGCTT |      |
|        |    | Exon 25   | FWD: GCTGGACAAGCAAAACAACA<br>REV: GCAACGAGTTCAGATTTGTCC  | FWD: GCTGGACAAGCAAAACAACA<br>REV: GCAACGAGTTCAGATTTGTCC  |      |
|        |    | Exon 26   | FWD: CCCTGGTCACTTTGCCTCT<br>REV: GCTTCTTTGGATTGGGAAG     | FWD: CCCTGGTCACTTTGCCTCT<br>REV: GCTTCTTTGGATTGGGAAG     |      |
|        |    | Exon 27_1 | FWD: TGACTCCATTTGGGGTTACAA<br>REV: TGTGTTGTTGGTGACATGGA  | FWD: TGACTCCATTTGGGGTTACAA<br>REV: TGTGTTGTTGGTGACATGGA  |      |
|        |    | Exon 27_2 | FWD: TACTGGGCCTGTTTTTCAGC<br>REV: TTCTGCACAGTCCCTCAGA    | FWD: TACTGGGCCTGTTTTTCAGC<br>REV: TTCTGCACAGTCCCTCAGA    |      |
|        |    |           |                                                          |                                                          |      |
| SLC5A8 | 15 | 5'UTR     | FWD: GCACAGATTTCTGCTCTCC<br>REV: AGTCCCACACCACGAAGGT     | FWD: GCACAGATTTCTGCTCTCC<br>REV: AGTCCCACACCACGAAGGT     | Fail |
|        |    | Exon 1    | FWD: GGGATCCGGGATAAGAAGTG<br>REV: GAGTGAAGGGAGGGTGATGA   | FWD: GGGATCCGGGATAAGAAGTG<br>REV: GAGTGAAGGGAGGGTGATGA   | Fail |
|        |    | Exon 2    | FWD: TGGGTGATGGAAGTGTCTTG<br>REV: GCATATTTCCGACTGTTGCT   | FWD: TGGGTGATGGAAGTGTCTTG<br>REV: GCATATTTCCGACTGTTGCT   |      |
|        |    | Exon 3    | FWD: ACCATTTGCACTAAGCACCA<br>REV: ATTCCTCCATCTCCCATCT    | FWD: ACCATTTGCACTAAGCACCA<br>REV: ATTCCTCCATCTCCCATCT    |      |
|        |    | Exon 4    | FWD: AGCCAGTGTGAGATCTGTGTG<br>REV: CTGCAGGAGGTTGGGAATAG  | FWD: AGCCAGTGTGAGATCTGTGTG<br>REV: CTGCAGGAGGTTGGGAATAG  |      |
|        |    | Exon 5    | FWD: CTCCATCTTGCCTCTGCTT<br>REV: CCTTAGCAATTTGTTGGCTTG   | FWD: CTCCATCTTGCCTCTGCTT<br>REV: CCTTAGCAATTTGTTGGCTTG   |      |
|        |    | Exon 6    | FWD: ATGTGCATTGCTTGCTTCC<br>REV: TTTATCCCCCATGGGTCTT     | FWD: ATGTGCATTGCTTGCTTCC<br>REV: TTTATCCCCCATGGGTCTT     |      |
|        |    | Exon 7    | FWD: GGAAATCCCATCCATTCAAA<br>REV: GCATGTCCACTTCCGTTTC    | FWD: GGAAATCCCATCCATTCAAA<br>REV: GCATGTCCACTTCCGTTTC    |      |
|        |    | Exon 8    | FWD: CAGTTCCCGAAGGAGACAAG<br>REV: CAACAGGACGCTAGTCCACA   | FWD: CAGTTCCCGAAGGAGACAAG<br>REV: CAACAGGACGCTAGTCCACA   |      |
|        |    | Exon 9    | FWD: TTTGTTTCCCCCTTCTCATT<br>REV: GGATGAAGGCACAGGAAAAA   | FWD: TTTGTTTCCCCCTTCTCATT<br>REV: GGATGAAGGCACAGGAAAAA   |      |
|        |    | Exon 10   | FWD: TGATGTGTGGCCATTCTT<br>REV: CCCTGCCACTTGATATGTCC     | FWD: TGATGTGTGGCCATTCTT<br>REV: CCCTGCCACTTGATATGTCC     |      |

|              |    |         |                                                               |                                                           |      |
|--------------|----|---------|---------------------------------------------------------------|-----------------------------------------------------------|------|
|              |    | Exon 11 | FWD: TTTCAGAAGGAGGCCGAATA<br>REV: TGGTTC TGGAAAGTTTCCATTG     | FWD: TTTCAGAAGGAGGCCGAATA<br>REV: TGGTTC TGGAAAGTTTCCATTG |      |
|              |    | Exon 12 | FWD: TGAATGTTTTCTGCCCTGTG<br>REV: TTTTGT TACCCTGCAGAA         | FWD: TGAATGTTTTCTGCCCTGTG<br>REV: TTTTGT TACCCTGCAGAA     |      |
|              |    | Exon 13 | FWD: TCAAGGTGAAGTTTGTCTTCA<br>REV: GGGCAGAACCAAGATTCAAA       | FWD: TCAAGGTGAAGTTTGTCTTCA<br>REV: GGGCAGAACCAAGATTCAAA   |      |
|              |    | Exon 14 | FWD: CTTTCAAGACCTGGGGCTAA<br>REV: CCTTCCTGTCCATCACTTTTC       | FWD: CTTTCAAGACCTGGGGCTAA<br>REV: CCTTCCTGTCCATCACTTTTC   |      |
|              |    | Exon 15 | FWD: TTGTCTGATGGGCTATTTTGT<br>REV: TCCCCAAAACACTCATGATA       | FWD: TTGTCTGATGGGCTATTTTGT<br>REV: TCCCCAAAACACTCATGATA   |      |
|              |    | 3'UTR 1 | FWD: GAGCAATGGGACTCGTTTGT<br>REV: TATGCCCTGGACTGATAGGG        | FWD: GAGCAATGGGACTCGTTTGT<br>REV: TATGCCCTGGACTGATAGGG    |      |
|              |    | 3'UTR 2 | FWD: GGAAGTTTGCCAAACATCACA<br>REV: CCATGGAGCTTAACCATTTTG      | FWD: GGAAGTTTGCCAAACATCACA<br>REV: CCATGGAGCTTAACCATTTTG  |      |
|              |    | 3'UTR 3 | FWD: CCCAAATCCTGGCTTATCAA<br>REV: TCAGCCTCCCAAATGTTTCAAG      | FWD: CCCAAATCCTGGCTTATCAA<br>REV: TCAGCCTCCCAAATGTTTCAAG  | Fail |
|              |    | 3'UTR 4 | FWD: GCCCTGTACATTTAGAGGTTGC<br>REV: GTTTTGAACATTGCCCAGGT      | FWD: GCCCTGTACATTTAGAGGTTGC<br>REV: GTTTTGAACATTGCCCAGGT  | Fail |
|              |    |         |                                                               |                                                           |      |
| <i>UTP20</i> | 62 | Exon 1  | FWD: AAGAACACCTCACCAAACG<br>REV: TCCAGTGTCTCCCTCTTTTCG        | FWD: AAGAACACCTCACCAAACG                                  |      |
|              |    | Exon 2  | FWD: CGGCCGTATGTTTTTCAGTT<br>REV: GAAACAGCACAGGTCTAAAGCA      | FWD: CGGCCGTATGTTTTTCAGTT                                 |      |
|              |    | Exon 3  | FWD: TGTGTTACTTAATGGCCTGTTTT<br>REV: GATTGAATGATTGGCATTGTGTC  | FWD: TGTGTTACTTAATGGCCTGTTTT                              |      |
|              |    | Exon 4  | FWD: AAACCTCACAGAACACTTCGGTA<br>REV: AAAAGGAAAATCCTCCTTGTTTCT | FWD: AAACCTCACAGAACACTTCGGTA                              |      |
|              |    | Exon 5  | FWD: TTGCCTGATTCTTTTGTCTGA<br>REV: TGGCTGGAGAATCAACTTTGT      | FWD: TTGCCTGATTCTTTTGTCTGA                                |      |
|              |    | Exon 6  | FWD: TGTTTGATACCTGCTGTGTATTCC<br>REV: GGGTTTTGCCATGTTGGT      | FWD: TGTTTGATACCTGCTGTGTATTCC<br>REV: GGGTTTTGCCATGTTGGT  |      |
|              |    | Exon 7  | FWD: TGAGAGTTCTTCATTTGGATATGTTT<br>REV: CTTCCCTCCACATCAATTGC  | FWD: TGAGAGTTCTTCATTTGGATATGTTT                           |      |
|              |    | Exon 8  | FWD: TTACAAATGTCTGTTCTTTTCACAA<br>REV: CCAACACTCCTCATCTAGTGCT | FWD: TTACAAATGTCTGTTCTTTTCACAA                            | Fail |
|              |    | Exon 9  | FWD: AAATGTATCTTTTTCTCCAAAGC<br>REV: AGCAAGATGTGGAGAGACTGG    | FWD: AAATGTATCTTTTTCTCCAAAGC                              |      |
|              |    | Exon 10 | FWD: GGAAGTGGGACAAAGATAACC<br>REV: CATGCAATTCCCATTTCCTT       | FWD: GGAAGTGGGACAAAGATAACC                                |      |
|              |    | Exon 11 | FWD: GCATCTGTGGAAGCACCTTT<br>REV: TGACTAAAACATCAAGCACTTATCC   | FWD: GCATCTGTGGAAGCACCTTT                                 |      |
|              |    | Exon 12 | FWD: GACATGGCTGCACAGTCTTT<br>REV: TTTTCACACA ACTTATCATGGACA   | FWD: GACATGGCTGCACAGTCTTT                                 |      |
|              |    | Exon 13 | FWD: GCCAGTGGAGTTGAAAAAGC<br>REV: CTGTCCAAGGGGAGAAAA          | FWD: GCCAGTGGAGTTGAAAAAGC                                 |      |

|  |  |         |                                                                  |                                 |  |
|--|--|---------|------------------------------------------------------------------|---------------------------------|--|
|  |  | Exon 14 | FWD: CCCTCGTGGTGTACCTCAT<br>REV: TATCATCCAGGGGTTATGC             | FWD: CCCTCGTGGTGTACCTCAT        |  |
|  |  | Exon 15 | FWD: TGACAGACAATTCTTTGGAAGG<br>REV: TTTCACTACGTGAATACAACTCAGG    | FWD: TGACAGACAATTCTTTGGAAGG     |  |
|  |  | Exon 16 | FWD: CGTGAGACTTTTGCCTGTACC<br>REV: TCGCTTAAACAGAAATCATCC         | FWD: CGTGAGACTTTTGCCTGTACC      |  |
|  |  | Exon 17 | FWD: GCACATATACTCTGGTCAAATGGT<br>REV: ATCTCCTGGCCTTGTGATCC       | FWD: GCACATATACTCTGGTCAAATGGT   |  |
|  |  | Exon 18 | FWD: TGGTATGGGGAGAAAAGAATCA<br>REV: GAGAACTGGGGATTCCCTTA         | FWD: TGGTATGGGGAGAAAAGAATCA     |  |
|  |  | Exon 19 | FWD: GGTTGTCCAACCTGGGATGT<br>REV: AGAATAATCTGGGCCCATC            | FWD: GGTTGTCCAACCTGGGATGT       |  |
|  |  | Exon 20 | FWD: CTCCACATTGAGGGATAACCT<br>REV: TCTGTTTTCCAATTCGTGAG          | FWD: CTCCACATTGAGGGATAACCT      |  |
|  |  | Exon 21 | FWD: TGCCCTCTCTTGAGAAAACAC<br>REV: TCAGCCACTTTGGGAGGTTA          | FWD: TGCCCTCTCTTGAGAAAACAC      |  |
|  |  | Exon 22 | FWD: TCATGAACAGAATCAGCACCTT<br>REV: GAAAATCCCAGGAAGATGTAGC       | FWD: TCATGAACAGAATCAGCACCTT     |  |
|  |  | Exon 23 | FWD: GCGGGGTGTTTGAAGTTCT<br>REV: TGGGCCCTATTAGCAATTA             | FWD: GCGGGGTGTTTGAAGTTCT        |  |
|  |  | Exon 24 | FWD: GCAAATAACCACAAGTAAATTGCTA<br>REV: GCTTGAAATACGATGACCTC      | FWD: GCAAATAACCACAAGTAAATTGCTA  |  |
|  |  | Exon 25 | FWD: GGATTTTCCTTTATGGATATCAACC<br>REV: CAAAGAAAATGCAATCAAAAAGA   | FWD: GGATTTTCCTTTATGGATATCAACC  |  |
|  |  | Exon 26 | FWD: GCTCTTCTAGCCTTTTAGGCAAA<br>REV: TGGGAGGAACAACCCTGTTA        | FWD: GCTCTTCTAGCCTTTTAGGCAAA    |  |
|  |  | Exon 27 | FWD: TTTGGTAAGAGTCAAAAAGGAGATAA<br>REV: CAAACTTGAAATGAGAGTTGGAAG | FWD: TTTGGTAAGAGTCAAAAAGGAGATAA |  |
|  |  | Exon 28 | FWD: TGCCTCTCTGAGGAATCAGG<br>REV: TCTGGGTGGTAGCTATGTTGG          | FWD: TGCCTCTCTGAGGAATCAGG       |  |
|  |  | Exon 29 | FWD: ATCCTGTGCTGTGATTTCTGT<br>REV: GTTTCCTGGACTGCTTAAACC         | FWD: ATCCTGTGCTGTGATTTCTGT      |  |
|  |  | Exon 30 | FWD: CATGGTGAATAATTCATATGGACA<br>REV: GGGAAAAGAACTTCTGAGCA       | FWD: CATGGTGAATAATTCATATGGACA   |  |
|  |  | Exon 31 | FWD: TG TTCATAGTGGTTGAGTGCTTTT<br>REV: ACGCCTGGCCAAGATAATAA      | FWD: TG TTCATAGTGGTTGAGTGCTTTT  |  |
|  |  | Exon 32 | FWD: GCTAGCTGTGTATTGGAATGCT<br>REV: TGCTGCTCGCAATTAACCT          | FWD: GCTAGCTGTGTATTGGAATGCT     |  |
|  |  | Exon 33 | FWD: GGAAGAACTGGTTCACACATTC<br>REV: GCTACCTGTCCCCATTCAAA         | FWD: GGAAGAACTGGTTCACACATTC     |  |
|  |  | Exon 34 | FWD: ACAGGTAGCTGAGGGGAGGA<br>REV: TTGATCGAAGGCGTTAAGCTA          | FWD: ACAGGTAGCTGAGGGGAGGA       |  |
|  |  | Exon 35 | FWD: GGGTTTCTCTTTGGCTTCAA<br>REV: AAAGATCAGGTCAGTATTAGGC         | FWD: GGGTTTCTCTTTGGCTTCAA       |  |
|  |  | Exon 36 | FWD: AGATGCTTGCACTGGGAAGT                                        | FWD: AGATGCTTGCACTGGGAAGT       |  |

|  |  |         |                                                                 |                                |      |
|--|--|---------|-----------------------------------------------------------------|--------------------------------|------|
|  |  |         | REV: CAGTAGCAAACGTGGGAAAA                                       |                                |      |
|  |  | Exon 37 | FWD: GTCCAGGCTGCCTCAAAC<br>REV: AAAACATGTCTTTCCAAATGAGG         | FWD: GTCCAGGCTGCCTCAAAC        |      |
|  |  | Exon 38 | FWD: AGAATACGATACTAAAATGGAGCTG<br>REV: AACTCCATGTATATTCTGGCAAAG | FWD: AGAATACGATACTAAAATGGAGCTG |      |
|  |  | Exon 39 | FWD: CCTGGGGTTAGAGGGAAAAA<br>REV: GAACTCATCATTTTTGGAAAGTCA      | FWD: CCTGGGGTTAGAGGGAAAAA      |      |
|  |  | Exon 40 | FWD: TTCCTCTCCTTTTATAATCCAGTGA<br>REV: GGGAAATAAGTTGAATGTCACCA  | FWD: TTCCTCTCCTTTTATAATCCAGTGA |      |
|  |  | Exon 41 | FWD: CTGCCCACAGTTGCTGATTA<br>REV: CACCAAGAGCCTCAGTGTA           | FWD: CTGCCCACAGTTGCTGATTA      |      |
|  |  | Exon 42 | FWD: ACAAAGTTGCAGTGTGGTAGA<br>REV: TCTTCTGACAAAAGAGACTCAA       | FWD: ACAAAGTTGCAGTGTGGTAGA     |      |
|  |  | Exon 43 | FWD: TCATAACTTGCTGTGGTTTCG<br>REV: GACAGGCCCAAAGTCCATA          | FWD: TCATAACTTGCTGTGGTTTCG     |      |
|  |  | Exon 44 | FWD: TGTTCTCTTTCAGTGCTTCC<br>REV: TTTCTTATTTGGTGAATTGATTTT      | FWD: TGTTCTCTTTCAGTGCTTCC      |      |
|  |  | Exon 45 | FWD: GGACATACCAGGGCCTTTTT<br>REV: CCAAAGGAAATCATGGGTGA          | FWD: GGACATACCAGGGCCTTTTT      |      |
|  |  | Exon 46 | FWD: TTTAATTAGGAGAAAAGCCAAACG<br>REV: TTAAAACAACCCACAGAATGG     | FWD: TTTAATTAGGAGAAAAGCCAAACG  |      |
|  |  | Exon 47 | FWD: GGGCCACTCTAACTTCTTGG<br>REV: TGAGCAGTACTAGAAATTCACAGA      | FWD: GGGCCACTCTAACTTCTTGG      |      |
|  |  | Exon 48 | FWD: TTTCTCTGAACATCATTTCACATT<br>REV: GCTTGAGCCCAAATACAACC      | FWD: TTTCTCTGAACATCATTTCACATT  |      |
|  |  | Exon 49 | FWD: AGCCTCAGGTGCTGCATAGT<br>REV: AGACACGGGGTCTCGTTATG          | FWD: AGCCTCAGGTGCTGCATAGT      |      |
|  |  | Exon 50 | FWD: CACCCTGTTTGGAAAAGCAT<br>REV: CACCTGTAATTGACCCACCA          | FWD: CACCCTGTTTGGAAAAGCAT      |      |
|  |  | Exon 51 | FWD: CTGTGGTTGCTTTAGCGTCA<br>REV: TCAGCCAGTGTGACACCTC           | FWD: CTGTGGTTGCTTTAGCGTCA      |      |
|  |  | Exon 52 | FWD: CCAAGTGAATCCAGAAAAGCAG<br>REV: AGACAGCCGCCATGTTAAAG        | FWD: CCAAGTGAATCCAGAAAAGCAG    |      |
|  |  | Exon 53 | FWD: GGAAAACAGAGCATTTC<br>REV: CAGAGTGAATTCTACAGATGC            | FWD: GGAAAACAGAGCATTTC         | Fail |
|  |  | Exon 54 | FWD: GAAGTCTCAGTCCCCCTT<br>REV: CAAAAATAACACTATTTGGGAAAAA       | FWD: GAAGTCTCAGTCCCCCTT        |      |
|  |  | Exon 55 | FWD: GGACAAAATAATGCCACCTT<br>REV: AAAGGACACTGTTGAACACAA         | FWD: GGACAAAATAATGCCACCTT      |      |
|  |  | Exon 56 | FWD: GTGGATTGATGTGCTGGAGT<br>REV: TTCGAATTCTCAAATCTACTTCA       | FWD: GTGGATTGATGTGCTGGAGT      |      |
|  |  | Exon 57 | FWD: TCATCTTTGGTTCCCACTC<br>REV: GCTGGCCCGAAGATAGTTAC           | FWD: TCATCTTTGGTTCCCACTC       |      |
|  |  | Exon 58 | FWD: GGTCAATTCAGAGCAAAAATCCA<br>REV: GACCTCGGGGTGATCTGG         | FWD: GGTCAATTCAGAGCAAAAATCCA   |      |

|               |    |          |                                                                |                                                                |      |
|---------------|----|----------|----------------------------------------------------------------|----------------------------------------------------------------|------|
|               |    | Exon 59  | FWD: TCTAAAAATGGAGCCTTCATCA<br>REV: TTGGGACGGATGTTATTGCT       | FWD: TCTAAAAATGGAGCCTTCATCA                                    |      |
|               |    | Exon 60  | FWD: GACTGAGCCCTGTTTTCTCAA<br>REV: AAAGGAAGAAGGAAACATTCAAGG    | FWD: GACTGAGCCCTGTTTTCTCAA                                     |      |
|               |    | Exon 61  | FWD: TTGCCAGATCAGTAGCTGGA<br>REV: CAAACCCCTGATCCTCCCTA         | FWD: TTGCCAGATCAGTAGCTGGA                                      |      |
|               |    | Exon 62  | FWD: GATTTTCTTTAATGAGCATGTGTTT<br>REV: TGCCTAGGAGGCACAACACTAC  | FWD: GATTTTCTTTAATGAGCATGTGTTT                                 |      |
|               |    | 3'UTR    | FWD: GGTGGAGTGCAGTGACGAC<br>REV: AAACAGTGAAGACCCAGCAG          | FWD: GGTGGAGTGCAGTGACGAC                                       |      |
|               |    |          |                                                                |                                                                |      |
| <i>ARL1</i>   | 6  | Exon 1   | FWD: CCAGAAAAACACAAGCAGGAG<br>REV: GGATCCACCCTACAGATGA         | FWD: CCAGAAAAACACAAGCAGGAG<br>REV: GGATCCACCCTACAGATGA         |      |
|               |    | Exon 2   | FWD: CACCTACGCATCCAGGAAAT<br>REV: CAGCTTGGACAACATAGTGATGA      | FWD: CACCTACGCATCCAGGAAAT<br>REV: CAGCTTGGACAACATAGTGATGA      |      |
|               |    | Exon 3   | FWD: CCATTTCTTTTAACTCGAATCC<br>REV: CATTTTAAACTAGGTGGCTCCATT   | FWD: CCATTTCTTTTAACTCGAATCC<br>REV: CATTTTAAACTAGGTGGCTCCATT   |      |
|               |    | Exon 4   | FWD: TCCACCAGAAACAGTGAATCAT<br>REV: CCCTCCTCAACTGTATTTTTGG     | FWD: TCCACCAGAAACAGTGAATCAT<br>REV: CCCTCCTCAACTGTATTTTTGG     |      |
|               |    | Exon 5   | FWD: GGAGGTAGGATTATGAGTGAAGC<br>REV: AAACGCTTGAGGAACTTATGAAA   | FWD: GGAGGTAGGATTATGAGTGAAGC<br>REV: AAACGCTTGAGGAACTTATGAAA   |      |
|               |    | Exon 6   | FWD: TCATCTGTGTAGCTGTCATCATT<br>REV: CAAGCTGCAACTACTATTCAAAAA  | FWD: TCATCTGTGTAGCTGTCATCATT<br>REV: CAAGCTGCAACTACTATTCAAAAA  |      |
|               |    | 3'UTR    | FWD: TTTGATCGAATCACCTGAATG<br>REV: CTTCACAAAGCTTCCTCTACCG      | FWD: TTTGATCGAATCACCTGAATG<br>REV: CTTCACAAAGCTTCCTCTACCG      |      |
|               |    |          |                                                                |                                                                |      |
| <i>SPIC</i>   | 5  | Exon 1   | FWD: GAGAATTCAGGAGGTACTCTTGGT<br>REV: TCCAAGACCTAAAAATTGAATTGC | FWD: GAGAATTCAGGAGGTACTCTTGGT<br>REV: TCCAAGACCTAAAAATTGAATTGC |      |
|               |    | Exon 2   | FWD: CAGAGACAGCCAACACCAAA<br>REV: TTAAGTGATCTGCCACCTTG         | FWD: CAGAGACAGCCAACACCAAA<br>REV: TTAAGTGATCTGCCACCTTG         | Fail |
|               |    | Exon 3   | FWD: TGCAAAGTGGCAAGAAAAACA<br>REV: TGCTGTCTTTAAGCTGGGTTT       | FWD: TGCAAAGTGGCAAGAAAAACA<br>REV: TGCTGTCTTTAAGCTGGGTTT       |      |
|               |    | Exon 4   | FWD: TTGGGGGTAATTCCTTTTGC<br>REV: TGGCTTGGACTGTTCAAGA          | FWD: TTGGGGGTAATTCCTTTTGC<br>REV: TGGCTTGGACTGTTCAAGA          |      |
|               |    | Exon 5_1 | FWD: ATGCCATCATGCATTTCGTAA<br>REV: GATCAGGTTGAACACACTGTGAA     | FWD: ATGCCATCATGCATTTCGTAA<br>REV: GATCAGGTTGAACACACTGTGAA     |      |
|               |    | Exon 5_2 | FWD: GCCAGGGCACTCAGAAATTA<br>REV: AACAGTAAGAGCAGAGCAAGGA       | FWD: GCCAGGGCACTCAGAAATTA<br>REV: AACAGTAAGAGCAGAGCAAGGA       | Fail |
|               |    |          |                                                                |                                                                |      |
| <i>MYBPC1</i> | 33 | Exon 1   | FWD: GCAGAGTGCAGACAACAGATG<br>REV: AAGATCGTTTCCTTAAATCATAGTG   | FWD: GCAGAGTGCAGACAACAGATG<br>REV: AAGATCGTTTCCTTAAATCATAGTG   |      |
|               |    | Exon 2   | FWD: CTCCTCCATCCCTCTTGTA<br>REV: GGTCAACATCCAACCTTCTCAG        | FWD: CTCCTCCATCCCTCTTGTA<br>REV: GGTCAACATCCAACCTTCTCAG        |      |
|               |    | Exon 3   | FWD: TCAGTATCATTATGACCTGTTCTG<br>REV: ATGCAAAGGCAGAACGAAAG     | FWD: TCAGTATCATTATGACCTGTTCTG<br>REV: ATGCAAAGGCAGAACGAAAG     |      |

|  |  |         |                                                                |                                                                |      |
|--|--|---------|----------------------------------------------------------------|----------------------------------------------------------------|------|
|  |  | Exon 4  | FWD: TGCTTCCATTGGATTACCC<br>REV: AGCCAACATTTCCTTCTTGG          | FWD: TGCTTCCATTGGATTACCC<br>REV: AGCCAACATTTCCTTCTTGG          |      |
|  |  | Exon 5  | FWD: TTTTCCATCCAAGCCAACCTT<br>REV: TGCGTGTGTATCATGCAAAA        | FWD: TTTTCCATCCAAGCCAACCTT<br>REV: TGCGTGTGTATCATGCAAAA        |      |
|  |  | Exon 6  | FWD: TGGGAATCTGTTCCCTCTA<br>REV: AGGTGCTGCCACCATGC             | FWD: TGGGAATCTGTTCCCTCTA<br>REV: AGGTGCTGCCACCATGC             |      |
|  |  | Exon 7  | FWD: AATTCGAGGGCACCAAT<br>REV: CTGCAATGGTAACTTCAGAGGA          | FWD: AATTCGAGGGCACCAAT<br>REV: CTGCAATGGTAACTTCAGAGGA          | Fail |
|  |  | Exon 8  | FWD: AGGACACATTTGCCCTCCTA<br>REV: CAAGCTTGCTGAGACTACCACA       | FWD: AGGACACATTTGCCCTCCTA<br>REV: CAAGCTTGCTGAGACTACCACA       |      |
|  |  | Exon 9  | FWD: CAGCCATTACAGGAGAAAAGC<br>REV: TGCTTGACTGGGCCTTAAAC        | FWD: CAGCCATTACAGGAGAAAAGC<br>REV: TGCTTGACTGGGCCTTAAAC        |      |
|  |  | Exon 10 | FWD: AGCGTAACACAAGCTCCTCA<br>REV: TCTATAAGCAAAAACACATTTTCAGA   | FWD: AGCGTAACACAAGCTCCTCA<br>REV: TCTATAAGCAAAAACACATTTTCAGA   |      |
|  |  | Exon 11 | FWD: CCATTCCAGCAAGCAAGACT<br>REV: CGTAACCCCTGCACTCCTAC         | FWD: CCATTCCAGCAAGCAAGACT<br>REV: CGTAACCCCTGCACTCCTAC         |      |
|  |  | Exon 12 | FWD: AAGGATAATTTGGAAGGTTTCTGA<br>REV: GCGACACAAAACCATAAATTGG   | FWD: AAGGATAATTTGGAAGGTTTCTGA<br>REV: GCGACACAAAACCATAAATTGG   |      |
|  |  | Exon 13 | FWD: ATGTTTGCACCACTGCACTC<br>REV: TCTCTTCTCCCTCTGCTG           | FWD: ATGTTTGCACCACTGCACTC<br>REV: TCTCTTCTCCCTCTGCTG           | Fail |
|  |  | Exon 14 | FWD: ACTGTTATCACCATGTCAACCA<br>REV: CACAAATGAGGTGGAGATTGTTT    | FWD: ACTGTTATCACCATGTCAACCA<br>REV: CACAAATGAGGTGGAGATTGTTT    |      |
|  |  | Exon 15 | FWD: TGGATACAGAGATTGATTCGTACA<br>REV: TGACATAGACACTTAGCTGGAATG | FWD: TGGATACAGAGATTGATTCGTACA<br>REV: TGACATAGACACTTAGCTGGAATG |      |
|  |  | Exon 16 | FWD: TTGCATTGGTACAGCTTCTCA<br>REV: GTTGAAGCGAAGAATCAGG         | FWD: TTGCATTGGTACAGCTTCTCA<br>REV: GTTGAAGCGAAGAATCAGG         |      |
|  |  | Exon 17 | FWD: TCTCCCTCTCTTCTGTCAC<br>REV: CCAATCTTCTGATTGGTGATTA        | FWD: TCTCCCTCTCTTCTGTCAC<br>REV: CCAATCTTCTGATTGGTGATTA        |      |
|  |  | Exon 18 | FWD: GCCAGGCACCAACTATCTTG<br>REV: TGATGATCAGATTTGCCTGAAA       | FWD: GCCAGGCACCAACTATCTTG<br>REV: TGATGATCAGATTTGCCTGAAA       |      |
|  |  | Exon 19 | FWD: GGGGGAGAATTAAACTGAGAAAA<br>REV: TGATAAGTCTCTAGGCAAGAAAA   | FWD: GGGGGAGAATTAAACTGAGAAAA<br>REV: TGATAAGTCTCTAGGCAAGAAAA   |      |
|  |  | Exon 20 | FWD: CAGCCAAACCATATCATAAGCA<br>REV: CTTTTGAATGCATAAAGTCACAG    | FWD: CAGCCAAACCATATCATAAGCA<br>REV: CTTTTGAATGCATAAAGTCACAG    |      |
|  |  | Exon 21 | FWD: TGCTATGGCTGACTTAACTGTGA<br>REV: CTCCTGCCACCTACAACCTC      | FWD: TGCTATGGCTGACTTAACTGTGA<br>REV: CTCCTGCCACCTACAACCTC      |      |
|  |  | Exon 22 | FWD: CCATGACAGCATTTCACAAA<br>REV: AGGATGACGTTTGGCTTGAT         | FWD: CCATGACAGCATTTCACAAA<br>REV: AGGATGACGTTTGGCTTGAT         |      |
|  |  | Exon 23 | FWD: GAGGACAAATCTCTTGCACAC<br>REV: TGCTTGGTCATTCAATATTCC       | FWD: GAGGACAAATCTCTTGCACAC<br>REV: TGCTTGGTCATTCAATATTCC       |      |
|  |  | Exon 24 | FWD: TCGGAGTCCAGACCAAAGTC<br>REV: ATCTCCACATTGCCTGAAG          | FWD: TCGGAGTCCAGACCAAAGTC<br>REV: ATCTCCACATTGCCTGAAG          |      |
|  |  | Exon 25 | FWD: GGCACATCTCAGAGTTTATTGC<br>REV: TTTTGACAGCAGGAGATTGC       | FWD: GGCACATCTCAGAGTTTATTGC<br>REV: TTTTGACAGCAGGAGATTGC       |      |
|  |  | Exon 26 | FWD: GCTCACCACCAGACTAGAAGG                                     | FWD: GCTCACCACCAGACTAGAAGG                                     |      |

|              |   |            |                                                                |                                                                |      |
|--------------|---|------------|----------------------------------------------------------------|----------------------------------------------------------------|------|
|              |   |            | REV: CACGCCAGCCTAATTTATC                                       | REV: CACGCCAGCCTAATTTATC                                       |      |
|              |   | Exon 27    | FWD: CCCATGGTAGGGTCTAGAAG<br>REV: GCCACATCACTTCTCCATAGC        | FWD: CCCATGGTAGGGTCTAGAAG<br>REV: GCCACATCACTTCTCCATAGC        |      |
|              |   | Exon 28    | FWD: TCAATTGCAAATAAGTTGTGAAA<br>REV: CCACTGCCTAGAACCTGGAA      | FWD: TCAATTGCAAATAAGTTGTGAAA<br>REV: CCACTGCCTAGAACCTGGAA      |      |
|              |   | Exon 29    | FWD: CATGGCATTGCTCATCTTT<br>REV: CCATCCTGGGAAGACACAAG          | FWD: CATGGCATTGCTCATCTTT<br>REV: CCATCCTGGGAAGACACAAG          |      |
|              |   | Exon 30    | FWD: TCCTTCTCAGATGCACTTTCTT<br>REV: TTAATTCCTCCCTGCTTCC        | FWD: TCCTTCTCAGATGCACTTTCTT<br>REV: TTAATTCCTCCCTGCTTCC        |      |
|              |   | Exon 31    | FWD: TTGGTCCTAAAAGTAAAGCTGAAA<br>REV: CCATGAGCTGCTAAGGGGTA     | FWD: TTGGTCCTAAAAGTAAAGCTGAAA<br>REV: CCATGAGCTGCTAAGGGGTA     |      |
|              |   | Exon 32    | FWD: GGATTAATGAAATCACCTCTTCA<br>REV: CTGCATTCAACAACCTTGCTTC    | FWD: GGATTAATGAAATCACCTCTTCA<br>REV: CTGCATTCAACAACCTTGCTTC    |      |
|              |   | Exon 33    | FWD: TCTTTGTAACATAATGGGAACATGA<br>REV: TTCAAGATCCAGTCGTGGTG    | FWD: TCTTTGTAACATAATGGGAACATGA<br>REV: TTCAAGATCCAGTCGTGGTG    |      |
|              |   |            |                                                                |                                                                |      |
| <i>CHPT1</i> | 8 | Exon 1     | FWD: AAGGACAGAGGGCAGGAGA<br>REV: CGCTCCTCAACTCAAAGG            | FWD: AAGGACAGAGGGCAGGAGA<br>REV: CGCTCCTCAACTCAAAGG            | Fail |
|              |   | Exon 2     | FWD: GATGACCAATCTGGGGAAGA<br>REV: TCGGCCATTGGTCGTTATTA         | FWD: GATGACCAATCTGGGGAAGA<br>REV: TCGGCCATTGGTCGTTATTA         | Fail |
|              |   | Exon 3     | FWD: AGGCGAGGAGGATGCTGAG<br>REV: AAATGGGGACGGGAGAG             | FWD: AGGCGAGGAGGATGCTGAG<br>REV: AAATGGGGACGGGAGAG             |      |
|              |   | Exon 4     | FWD: AAACCCATTTTCTCTTCAGGA<br>REV: TCTTTTCAGCCATAACCCACAG      | FWD: AAACCCATTTTCTCTTCAGGA<br>REV: TCTTTTCAGCCATAACCCACAG      |      |
|              |   | Exon 5     | FWD: TTGATGGATAGTTTGTCTCTC<br>REV: TTTCTGGCAGAATCTGTGTT        | FWD: TTGATGGATAGTTTGTCTCTC<br>REV: TTTCTGGCAGAATCTGTGTT        |      |
|              |   | Exon 6     | FWD: ATATTCCCAAGGGCCATAAT<br>REV: TCAACCAATGACTGCAATGAA        | FWD: ATATTCCCAAGGGCCATAAT<br>REV: TCAACCAATGACTGCAATGAA        |      |
|              |   | Exon 7     | FWD: CCTCATTGTTCTTTCTGTACTTTG<br>REV: TGAAACCCCTCCTTTAAATTG    | FWD: CCTCATTGTTCTTTCTGTACTTTG<br>REV: TGAAACCCCTCCTTTAAATTG    |      |
|              |   | Exon 8_1   | FWD: GGCTCTACACTGGCCACCTA<br>REV: CCATGAAATGTGCTGAGTGG         | FWD: GGCTCTACACTGGCCACCTA<br>REV: CCATGAAATGTGCTGAGTGG         |      |
|              |   | Exon 8_2   | FWD: ACTTTCTGTGGCCACCTACG<br>REV: TGTAGTTGCACATGCCTTCA         | FWD: ACTTTCTGTGGCCACCTACG<br>REV: TGTAGTTGCACATGCCTTCA         |      |
|              |   | Exon 8_3   | FWD: GCTGTAATAATTGGTAAATGGATTC<br>REV: TGCCATGTGTGACTTTAAGTGTT | FWD: GCTGTAATAATTGGTAAATGGATTC<br>REV: TGCCATGTGTGACTTTAAGTGTT |      |
|              |   |            |                                                                |                                                                |      |
| <i>SYCP3</i> | 8 | 5'UTR      | FWD: ACCCTGGGCCAGCTATTT<br>REV: CTCCGTTTCTCGTCAGAGG            | FWD: ACCCTGGGCCAGCTATTT                                        | Fail |
|              |   | Exon 1     | FWD: TCCTTGTTTCGATATCTCCTTTGA<br>REV: CCGTGTGACAGGTTCTGTA      | FWD: TCCTTGTTTCGATATCTCCTTTGA                                  |      |
|              |   | Exon 2 & 3 | FWD: GCCTAAAAATCCCAAATGA<br>REV: TGTGAGAACAAGGCATTAATAACA      | FWD: GCCTAAAAATCCCAAATGA                                       |      |
|              |   | Exon 4     | FWD: TTGTTGAACCAACCTTACCC<br>REV: CAAGTGATCTGCCTGCCTTG         | FWD: TGAACCAACCTTACCCATATT<br>REV: CCGTGCCGATCTAGAATAGTA       |      |

|               |   |         |                                                                   |                                |      |
|---------------|---|---------|-------------------------------------------------------------------|--------------------------------|------|
|               |   | Exon 5  | FWD: TTTTGGTTTCCCATCAGAAGA<br>REV: TTTAAAACACATGGCCAGCA           | FWD: TTTTGGTTTCCCATCAGAAGA     |      |
|               |   | Exon 6  | FWD: GCATTGATTTTAAACACTTTCTTTT<br>REV: TCCCAACAAAACCATTTGAA       | FWD: GCATTGATTTTAAACACTTTCTTTT |      |
|               |   | Exon 7  | FWD: GTTCAGGAAACCCATTGTGG<br>REV: TCTTGCTGCTGCTTTTCAT             | FWD: GTTCAGGAAACCCATTGTGG      | Fail |
|               |   | Exon 8  | FWD: GAAATATTTTATTTGCTGAAATAGG<br>REV: ATGTAATAATAGATTTTGTATTCCGT | FWD: GAAATATTTTATTTGCTGAAATAGG |      |
|               |   |         |                                                                   |                                |      |
| <i>DRAM</i>   | 7 | 5'UTR   | FWD: GGCGAACCTCATTGAACACT<br>REV: ATTCCCTCAGGAAGCACAG             | FWD: GGCGAACCTCATTGAACACT      | Fail |
|               |   | Exon 1  | FWD: CGCTTTGTGACTTCACTCGT<br>REV: GGGTACAGGCAGAAAGTGCTC           | FWD: CGCTTTGTGACTTCACTCGT      | Fail |
|               |   | Exon 2  | FWD: TGGAATTCAAAGTGCTGAA<br>REV: CTGAGGTGGGAGGACTGCT              | FWD: TGGAATTCAAAGTGCTGAA       |      |
|               |   | Exon 3  | FWD: GATGGAGTCAGGAGGGACAG<br>REV: TGGCTATAATGGCATAAGTGTG          | FWD: GATGGAGTCAGGAGGGACAG      |      |
|               |   | Exon 4  | FWD: GGTGCATCTGTGATGACCAA<br>REV: CCTGCTGTCAGAACTCATTGC           | FWD: GGTGCATCTGTGATGACCAA      |      |
|               |   | Exon 5  | FWD: TCTCATCATTGAATTTGAAGTTTG<br>REV: TGCCATGTTTATTTGACATTTTG     | FWD: TCTCATCATTGAATTTGAAGTTTG  |      |
|               |   | Exon 6  | FWD: CTTTGAATACCTGCCTTCG<br>REV: AGTGCTCTTTTGCAGTGAGC             | FWD: CTTTGAATACCTGCCTTCG       |      |
|               |   | Exon 7  | FWD: CTCAAGCATAGCACAAACCA<br>REV: CAAATAAAAACAAAACGACAGAATC       | FWD: CTCAAGCATAGCACAAACCA      |      |
|               |   | 3'UTR 1 | FWD: CAGCCTTATGACACTGTAGTGATG<br>REV: GTGCGACCTCATGAGCAG          | FWD: CAGCCTTATGACACTGTAGTGATG  | Fail |
|               |   | 3'UTR 2 | FWD: GCCGAACTAAACAAAGTGCTTC<br>REV: TGCTTAACACAAAGGGCTTG          | FWD: GCCGAACTAAACAAAGTGCTTC    |      |
|               |   | 3'UTR 3 | FWD: CCCAAGAGCGAGACAAGAAG<br>REV: CATTTCCTTTTATTGCCAGA            | FWD: CCCAAGAGCGAGACAAGAAG      |      |
|               |   |         |                                                                   |                                |      |
| <i>CCDC53</i> | 7 | Exon 1  | FWD: CTAAGTGCATCCTTGCACCA<br>REV: CCCATTTCAAGGTGGACTGT            | FWD: CTAAGTGCATCCTTGCACCA      | Fail |
|               |   | Exon 2  | FWD: AGCAAAGTGCCTCGTGATTA<br>REV: TCACGGTACATGAATAAAGACTGT        | FWD: AGCAAAGTGCCTCGTGATTA      |      |
|               |   | Exon 3  | FWD: TTTTCATATCTGCCCTTAGTTATTG<br>REV: CACTCCCAAATGCAATGAAA       | FWD: TTTTCATATCTGCCCTTAGTTATTG |      |
|               |   | Exon 4  | FWD: TGACATGGAAAATTAAAGACAAGAT<br>REV: TGTTTTTCCCAAACCTCATTTC     | FWD: TGACATGGAAAATTAAAGACAAGAT | Fail |
|               |   | Exon 5  | FWD: AAATTGGGGGAGATGATTTTT<br>REV: TTGGTTACTTGGTTTAGCAGTTTTC      | FWD: AAATTGGGGGAGATGATTTTT     |      |
|               |   | Exon 6  | FWD: TTTTAAATAATGAGGCATCTGAAGG<br>REV: TCCTCAACCATAAAAACACTGTAGG  | FWD: TTTTAAATAATGAGGCATCTGAAGG |      |
|               |   | Exon 7  | FWD: GACACGGACTTGGCAGATTT                                         | FWD: GACACGGACTTGGCAGATTT      | Fail |

|                 |   |         |                                                                |                                |      |
|-----------------|---|---------|----------------------------------------------------------------|--------------------------------|------|
|                 |   |         | REV: CGTGCCTGACTGTAATTGCT                                      |                                |      |
| <i>NUP37</i>    | 9 | Exon 1  | FWD: TTTCTTTTGAGCTTTCTGTCTCA<br>REV: CAGGCACATATAACTGGGAACA    | FWD: TTTCTTTTGAGCTTTCTGTCTCA   |      |
|                 |   | Exon 2  | FWD: AAAAGCATAAGCATAACCTCCTG<br>REV: TTGGATTGTGGAAAATGGAAA     | FWD: AAAAGCATAAGCATAACCTCCTG   |      |
|                 |   | Exon 3  | FWD: TCAGTGATCTGAAGGGAAGGA<br>REV: TGATGACCATAAAAAAGCCATT      | FWD: TCAGTGATCTGAAGGGAAGGA     |      |
|                 |   | Exon 4  | FWD: GCTTTTAAGGCAGTGAAGCAA<br>REV: TGAAACTCATGTTTGTGCCATA      | FWD: GCTTTTAAGGCAGTGAAGCAA     |      |
|                 |   | Exon 5  | FWD: TGTGTGACTCTTTTGTCCATGA<br>REV: ATCCAAATGCCTTTGTGCTG       | FWD: TGTGTGACTCTTTTGTCCATGA    |      |
|                 |   | Exon 6  | FWD: CATTTTACCGTACAACAGTGAATC<br>REV: TGCTTTCGCTTGACAGCATA     | FWD: CATTTTACCGTACAACAGTGAATC  |      |
|                 |   | Exon 7  | FWD: TCATCTGTTTTAACTGATTGCTTG<br>REV: AAATCCAGTGCAAAGAAGAGAAC  | FWD: TCATCTGTTTTAACTGATTGCTTG  |      |
|                 |   | Exon 8  | FWD: TGTTAGCACTTCTGCACTCCA<br>REV: GAACCACCTTTCTTCAATTT        | FWD: TGTTAGCACTTCTGCACTCCA     |      |
|                 |   | Exon 9  | FWD: TGCTACAAAGATAAATCATCAATGC<br>REV: CTGGAGGTGAGCTGCTGAG     | FWD: TGCTACAAAGATAAATCATCAATGC |      |
| <i>C12orf48</i> | 9 | 5'UTR 1 | FWD: GGCAGGCTGGTCTTCCTT<br>REV: CTGTGAACTCCGCCTACAGC           | FWD: GGCAGGCTGGTCTTCCTT        | Fail |
|                 |   | 5'UTR 2 | FWD: CTTGGTAAATATGAAATGACCTCTC<br>REV: CACAGAAGGGCACATAATGTAAG | FWD: CTTGGTAAATATGAAATGACCTCTC |      |
|                 |   | 5'UTR 3 | FWD: GCACAATCTCCGCTCACTGT<br>REV: TCCCACTTAAACAGTTGAGAAAAA     | FWD: GCACAATCTCCGCTCACTGT      |      |
|                 |   | Exon 1  | FWD: GGTGTTCTCTTCAAACCCACA<br>REV: TTCACAAAGCAAAAAACATTACCA    | FWD: GGTGTTCTCTTCAAACCCACA     |      |
|                 |   | Exon 2  | FWD: CTCTCAACTGAAACATCAATGACA<br>REV: CATTCTCACCAGCTCCAAT      | FWD: CTCTCAACTGAAACATCAATGACA  |      |
|                 |   | Exon 3  | FWD: AAGAATTTGGGGAGAGATGGA<br>REV: CCATGGATTTTCAAATACAGAGGT    | FWD: AAGAATTTGGGGAGAGATGGA     |      |
|                 |   | Exon 4  | FWD: TGAGCCATAAAATGTGCTTCAC<br>REV: TTTGGTCTGATGCTTGGTCA       | FWD: TGAGCCATAAAATGTGCTTCAC    |      |
|                 |   | Exon 5  | FWD: TGGTCCTTATCTTTTCTTAAATGC<br>REV: CACAGGAAACACACTCTTCTGAC  | FWD: TGGTCCTTATCTTTTCTTAAATGC  |      |
|                 |   | Exon 6  | FWD: AAATGGTCACATGCCTCACA<br>REV: TTCAAATGTTCAATCCCTTT         | FWD: AAATGGTCACATGCCTCACA      |      |
|                 |   | Exon 7  | FWD: TGGGAGGTAACCCCATCATA<br>REV: GGAAAGTCTCTGTACGTCAACTG      | FWD: TGGGAGGTAACCCCATCATA      |      |
|                 |   | Exon 8  | FWD: AAAGGTTAGAGAGAGGTTCTCAATG<br>REV: TCAAACGTGTCTTATCTCATCG  | FWD: AAAGGTTAGAGAGAGGTTCTCAATG |      |
|                 |   | Exon 9  | FWD: TTGAATATTCGTTAGCCATTTTTA<br>REV: CATGTCCTTGGTGAATGGTTT    | FWD: TTGAATATTCGTTAGCCATTTTTA  |      |

|                       |   |         |                                                                 |                               |      |
|-----------------------|---|---------|-----------------------------------------------------------------|-------------------------------|------|
|                       |   | 3'UTR 1 | FWD: TTTCTGGCCAGGCAAAGTTA<br>REV: TTTCTTCTTCCTTCAGTGCTCA        | FWD: TTTCTGGCCAGGCAAAGTTA     |      |
|                       |   | 3'UTR 2 | FWD: TCCTCCCATTGGCAATTA<br>REV: CCCAGCTGAGAAATGGAGTTC           | FWD: TCCTCCCATTGGCAATTA       | Fail |
|                       |   | 3'UTR 3 | FWD: TGAGTTTTTCTTCATCCCAAT<br>REV: GCTCCTTCCCTGGAACAATA         | FWD: TGAGTTTTTCTTCATCCCAAT    |      |
|                       |   |         |                                                                 |                               |      |
| <i>PMCH</i>           | 3 | Exon 1  | FWD: GCTGCATAAAGGTTAGCCTCA<br>REV: ATCGTCAGTCGCTCAATGC          | FWD: GCTGCATAAAGGTTAGCCTCA    |      |
|                       |   | Exon 2  | FWD: CATCCCAGCAAACACCTCTT<br>REV: TTGAGCCATGGTCTTATTGA          | FWD: CATCCCAGCAAACACCTCTT     |      |
|                       |   | Exon 3  | FWD: AAAATGTGGGATTAATAGCAACAA<br>REV: GCTTAATTTTAAAGAGATCAAGGTG | FWD: AAAATGTGGGATTAATAGCAACAA |      |
|                       |   |         |                                                                 |                               |      |
| <i>IGF1 isoform 1</i> | 5 | Exon 1  | FWD: ATTTGTCACCATGCCCAAAA<br>REV: CGGTTCCGAAACAATGAAAA          | FWD: ATTTGTCACCATGCCCAAAA     |      |
|                       |   | Exon 2  | FWD: GCTTCTGTGCTGGGTAGTCC<br>REV: CAGATACGGGCACTCATTCA          | FWD: GCTTCTGTGCTGGGTAGTCC     |      |
|                       |   | Exon 3  | FWD: AAGAGGTTGAGACATTGCAGAA<br>REV: AGGAGACTATGGGGCAGGAT        | FWD: AAGAGGTTGAGACATTGCAGAA   |      |
|                       |   | Exon 4  | FWD: GAGTGCTGTCTCCTGCATCA<br>REV: TTTTTCATTTTGCCACTGTC          | FWD: GAGTGCTGTCTCCTGCATCA     |      |
|                       |   | Exon 5  | FWD: AAGGCGTAAGACATGGAAGG<br>REV: CATGCATTTGTGGCTTTGA           | FWD: AAGGCGTAAGACATGGAAGG     |      |
|                       |   | 3'UTR 1 | FWD: AGATTGCTGTTGATCTTTATCAAT<br>REV: ATGATTGGCCTCAAAGTTGC      | FWD: AGATTGCTGTTGATCTTTATCAAT |      |
|                       |   | 3'UTR 2 | FWD: AGATTCCATCTGTGGCATTG<br>REV: TCCTCTTGAAGGCATAACTG          | FWD: AGATTCCATCTGTGGCATTG     |      |
|                       |   | 3'UTR 3 | FWD: GAGTCTGGCCAAAACGGTAA<br>REV: AGAATTCCTTGCATCTCAGCA         | FWD: GAGTCTGGCCAAAACGGTAA     |      |
|                       |   |         |                                                                 |                               |      |
| <i>IGF1 isoform 2</i> | 5 | Exon 1  | FWD: GGAAGGGAGTAAGGGAGTGG<br>REV: AAAAAATCATTCAAAACCCAAA        | FWD: GGAAGGGAGTAAGGGAGTGG     |      |
|                       |   | Exon 2  | FWD: GCTTCTGTGCTGGGTAGTCC<br>REV: CAGATACGGGCACTCATTCA          | FWD: GCTTCTGTGCTGGGTAGTCC     |      |
|                       |   | Exon 3  | FWD: AAGAGGTTGAGACATTGCAGAA<br>REV: AGGAGACTATGGGGCAGGAT        | FWD: AAGAGGTTGAGACATTGCAGAA   |      |
|                       |   | Exon 4  | FWD: GAGTGCTGTCTCCTGCATCA<br>REV: TTTTTCATTTTGCCACTGTC          | FWD: GAGTGCTGTCTCCTGCATCA     |      |
|                       |   | Exon 5  | FWD: AAGGCGTAAGACATGGAAGG<br>REV: CATGCATTTGTGGCTTTGA           | FWD: AAGGCGTAAGACATGGAAGG     |      |
|                       |   | 3'UTR 1 | FWD: AGATTGCTGTTGATCTTTATCAAT<br>REV: ATGATTGGCCTCAAAGTTGC      | FWD: AGATTGCTGTTGATCTTTATCAAT |      |
|                       |   | 3'UTR 2 | FWD: AGATTCCATCTGTGGCATTG<br>REV: TCCTCTTGAAGGCATAACTG          | FWD: AGATTCCATCTGTGGCATTG     |      |

|              |    |          |                                                         |                                                        |      |
|--------------|----|----------|---------------------------------------------------------|--------------------------------------------------------|------|
|              |    | 3'UTR 3  | FWD: GAGTCTGGCCAAAACGGTAA<br>REV: AGAATTCCTTGCATCTCAGCA | FWD: GAGTCTGGCCAAAACGGTAA                              |      |
| <i>PAH</i>   | 12 | 5'UTR    | FWD: TCACGTGCCCTCTAGCTGTA<br>REV: TCGCACTAGGGAGGAGAAGA  | FWD: TCACGTGCCCTCTAGCTGTA                              | Fail |
|              |    | Exon 1   | FWD: AGCGAAGTGGTGCCTCCT<br>REV: TTCTCATCAGCTTCCAACGA    | FWD: AGCGAAGTGGTGCCTCCT                                | Fail |
|              |    | Exon 2   | FWD: TCATTTAATTGCCCTGGACTT<br>REV: GCCTGTTCCAGATCCTGTGT | FWD: TCATTTAATTGCCCTGGACTT                             | Fail |
|              |    | Exon 3   | FWD: TCTCCATTTTGTGGCTTAGG<br>REV: AATCCCCAAACAGTCTCC    | FWD: TCTCCATTTTGTGGCTTAGG                              |      |
|              |    | Exon 4   | FWD: TTGGGGTTATCTGGAAGC<br>REV: CCCAGCCCTCGTGAAATAG     | FWD: TTGGGGTTATCTGGAAGC                                |      |
|              |    | Exon 5   | FWD: ATGCACTGTCATGGCTTGAG<br>REV: GCAGGACTTTCATGCTGGT   | FWD: ATGCACTGTCATGGCTTGAG                              |      |
|              |    | Exon 6   | FWD: GATGGCAGCTCACAGTTCT<br>REV: CATACTGCCTCCACATACTTG  | FWD: GATGGCAGCTCACAGTTCT                               |      |
|              |    | Exon 7   | FWD: TGCCTAGCGTCAAAGCCTAT<br>REV: CTGTGGACCAGCCAGCAAT   | FWD: TGCCTAGCGTCAAAGCCTAT                              |      |
|              |    | Exon 8   | FWD: TCCTGGGAGAGGGATCATAA<br>REV: CTTGCAGAGGGCATGAGG    | FWD: TCCTGGGAGAGGGATCATAA                              | Fail |
|              |    | Exon 9   | FWD: CATCTGGCCACCCATCAC<br>REV: CCTGGCTTCCAGGGGAGT      | FWD: CATCTGGCCACCCATCAC                                | Fail |
|              |    | Exon 10  | FWD: GATCTTCCCCACTCAGTCCA<br>REV: AATGAGTTCCCAGTTGCAT   | FWD: GATCTTCCCCACTCAGTCCA                              | Fail |
|              |    | Exon 11  | FWD: AGAAGGAATCGGGGTGAGAT<br>REV: GGTGGAGAACATGGGAGAGA  | FWD: AGAAGGAATCGGGGTGAGAT                              |      |
|              |    | Exon 12  | FWD: GGAGGTGTCCGTGTTCTTAA<br>REV: AACCCATGGCTTACATGGAG  | FWD: GGAGGTGTCCGTGTTCTTAA                              |      |
|              |    | Exon 13  | FWD: CTCATCCAAGAAGCCCACTT<br>REV: TGAAGCTTGAATGAAGCAGGT | FWD: CTCATCCAAGAAGCCCACTT                              |      |
| <i>ASCLI</i> | 2  | 5'UTR 1  | FWD: AGACTCGGGACCTTTGTGAA<br>REV: GTGATGATGGTGGGCAGTAA  | FWD: AGACTCGGGACCTTTGTGAA<br>REV: GTGATGATGGTGGGCAGTAA |      |
|              |    | 5'UTR 2  | FWD: GACCTCTGTTGGCACGATTT<br>REV: GTGGGGATTCTGGTTCTTC   | FWD: GACCTCTGTTGGCACGATTT<br>REV: GTGGGGATTCTGGTTCTTC  |      |
|              |    | 5'UTR 3  | FWD: CAGACGTCTGAAGCTGGA<br>REV: TCTGCAGCCACAGAATATGG    | FWD: CAGACGTCTGAAGCTGGA<br>REV: TCTGCAGCCACAGAATATGG   |      |
|              |    | 5'UTR 4  | FWD: CTGCCATATACACCCACCT<br>REV: GACTCCCAGCTGAATAAACA   | FWD: CTGCCATATACACCCACCT<br>REV: GACTCCCAGCTGAATAAACA  |      |
|              |    | 5'UTR 5  | FWD: TTCACCCAAAGTCTTTCCAC<br>REV: ACTAAGGCTGCGCTCTCTTG  | FWD: TTCACCCAAAGTCTTTCCAC<br>REV: ACTAAGGCTGCGCTCTCTTG |      |
|              |    | 5'UTR 6  | FWD: GCCCAGCACTCTCTCACTTC<br>REV: TCTCCATCTTGGCAGAGCTT  | FWD: GCCCAGCACTCTCTCACTTC<br>REV: TCTCCATCTTGGCAGAGCTT |      |
|              |    | Exon 1_1 | FWD: GTCTCCCGGGGATTTTGTAT                               | FWD: GTCTCCCGGGGATTTTGTAT                              |      |

|                 |    |          |                                                              |                                                         |      |
|-----------------|----|----------|--------------------------------------------------------------|---------------------------------------------------------|------|
|                 |    |          | REV: CCAGGTTGACCAACTTGACG                                    | REV: CCAGGTTGACCAACTTGACG                               |      |
|                 |    | Exon 1_2 | FWD: GAACTGATGCGCTGCAAAAC<br>REV: CACTCAGAGGGAGGACGAAG       | FWD: GAACTGATGCGCTGCAAAAC<br>REV: CACTCAGAGGGAGGACGAAG  |      |
|                 |    | 3'UTR 1  | FWD: CATCTCCCCAACTACTCCA<br>REV: AACGCCACTGACAAGAAAGC        | FWD: CATCTCCCCAACTACTCCA<br>REV: AACGCCACTGACAAGAAAGC   |      |
|                 |    | 3'UTR 2  | FWD: CCAGACCTCCATCTCCCTCT<br>REV: GCAGAGTTCAAAGGGCTGA        | FWD: CCAGACCTCCATCTCCCTCT<br>REV: GCAGAGTTCAAAGGGCTGA   |      |
|                 |    | 3'UTR 3  | FWD: TCACCTCTAACACGCACAGC<br>REV: TACAACCTGGTGGCCTCTGA       | FWD: TCACCTCTAACACGCACAGC<br>REV: TACAACCTGGTGGCCTCTGA  |      |
|                 |    | 3'UTR 4  | FWD: TCCTAACCAGTTCGGGGATA<br>REV: CATTTTCTTCCATCCACCT        | FWD: TCCTAACCAGTTCGGGGATA<br>REV: CATTTTCTTCCATCCACCT   |      |
|                 |    | 3'UTR 5  | FWD: TGATAGGTTGCCTTTTGGAGA<br>REV: ATCCCAGAACCACCATCCTC      | FWD: TGATAGGTTGCCTTTTGGAGA<br>REV: ATCCCAGAACCACCATCCTC |      |
|                 |    |          |                                                              |                                                         |      |
| <i>C12orf42</i> | 5  | 5'UTR    | FWD: CTGTGACTTTGGTGGCAGTC<br>REV: CCGTGCTGCCTCTTCTCAC        | FWD: CTGTGACTTTGGTGGCAGTC                               | Fail |
|                 |    | Exon 1   | FWD: TTGAAAGTCACTGGCAAGAAA<br>REV: TGATGTGAGTATGGATAAATATGGA | FWD: TTGAAAGTCACTGGCAAGAAA                              |      |
|                 |    | Exon 2   | FWD: TGAATGAACAGCCATTGTTTG<br>REV: AGGAGTTGGCATGACTCTCAA     | FWD: TGAATGAACAGCCATTGTTTG                              |      |
|                 |    | Exon 3   | FWD: TGATTGTTTTCAGGATTGTTTCA<br>REV: CCTCTTTTGTGTCATTTTGA    | FWD: TGATTGTTTTCAGGATTGTTTCA                            |      |
|                 |    | Exon 4_1 | FWD: CAGACCCTCCCTCTTCTTC<br>REV: CTGATGTGTATGCCCTGAGC        | FWD: CAGACCCTCCCTCTTCTTC<br>REV: CTGATGTGTATGCCCTGAGC   | Fail |
|                 |    | Exon 4_2 | FWD: GCCAGAGGAGAAACTGAGGAG<br>REV: GGACTGGCCATGAAGTCAAT      | FWD: GCCAGAGGAGAAACTGAGGAG                              |      |
|                 |    | Exon 5_1 | FWD: TCTGAGCACATTACAAATGTTGA<br>REV: ATTGCCATGGAGGGAGGT      | FWD: TCTGAGCACATTACAAATGTTGA                            |      |
|                 |    | Exon 5_2 | FWD: CTCCCAAGCATCCTCATA<br>REV: GCGATGTACCCCATCCCTAT         | FWD: CTCCCAAGCATCCTCATA                                 | Fail |
|                 |    |          |                                                              |                                                         |      |
| <i>STAB2</i>    | 69 | 5'UTR 1  | FWD: AACAAACATGGCCAATCCAT<br>REV: CCCCAGCTCCTTTCAACTTT       | FWD: AACAAACATGGCCAATCCAT                               |      |
|                 |    | 5'UTR 2  | FWD: CCCAGGAAGCTTTGAAAAAT<br>REV: CCCTCTGCTGCTGAAACAAT       | FWD: CCCAGGAAGCTTTGAAAAAT                               | Fail |
|                 |    | 5'UTR 3  | FWD: GAGACATGCCCTGGTTTGT<br>REV: GATCTAAAGCCACCCCTTCC        | FWD: GAGACATGCCCTGGTTTGT                                | Fail |
|                 |    | 5'UTR 4  | FWD: GGCATGGGAGACAGACAGAT<br>REV: TCTACTCTGCCCTCCTCT         | FWD: GGCATGGGAGACAGACAGAT                               |      |
|                 |    | 5'UTR 5  | FWD: CAAGCTTGGACCTTGCATT<br>REV: CTCCTTTACCTGCCCTGTG         | FWD: CAAGCTTGGACCTTGCATT                                |      |
|                 |    | Exon 1   | FWD: TTCTGAAGGCAGGTCTCACC<br>REV: CACACCTTCGAAAGATGGT        | FWD: TTCTGAAGGCAGGTCTCACC                               |      |
|                 |    | Exon 2   | FWD: TGAAAGGAGCAAACCAGTCA<br>REV: TACAGGCATGAACCACCACA       | FWD: TGAAAGGAGCAAACCAGTCA                               | Fail |

|  |  |         |                                                              |                                                            |      |
|--|--|---------|--------------------------------------------------------------|------------------------------------------------------------|------|
|  |  | Exon 3  | FWD: GAAAGCCAAATGTGTTCCATC<br>REV: TGAAAGCTAACAGGGCAAGA      | FWD: GAAAGCCAAATGTGTTCCATC                                 |      |
|  |  | Exon 4  | FWD: GACACCAACAGGTTCTGCAA<br>REV: CCCCAGGCTATAAATGGTCA       | FWD: GACACCAACAGGTTCTGCAA                                  |      |
|  |  | Exon 5  | FWD: AGCTCCAGGATAGGCACAGA<br>REV: TCATTGCCCGATTAACCTCC       | FWD: AGCTCCAGGATAGGCACAGA                                  |      |
|  |  | Exon 6  | FWD: GGAGCCAAAGTTCAAACAACA<br>REV: CCCCTGCAGAGAACCAGTAA      | FWD: GGAGCCAAAGTTCAAACAACA                                 |      |
|  |  | Exon 7  | FWD: TGATATCGGTAAATTTGGGAGA<br>REV: CATTTTGCTTGGCACCTTTT     | FWD: TGATATCGGTAAATTTGGGAGA                                |      |
|  |  | Exon 8  | FWD: TGCCTTTGAGGTTTTGATCC<br>REV: TGAAAGGGAGAATTGGGATG       | FWD: TGCCTTTGAGGTTTTGATCC<br>REV: TGAAAGGGAGAATTGGGATG     | Fail |
|  |  | Exon 9  | FWD: CCAGCAGGTGACATGTGTAAA<br>REV: CAAGAACTTACAGCAATGACTGG   | FWD: CCAGCAGGTGACATGTGTAAA                                 |      |
|  |  | Exon 10 | FWD: GCATCCTTTGCTCCATCTGT<br>REV: CCCTCCAAAAAGGCTGATTC       | FWD: GCATCCTTTGCTCCATCTGT                                  |      |
|  |  | Exon 11 | FWD: CATAAATGGACCGTTCGTG<br>REV: TGGGGATTCCCACCTTAAATA       | FWD: CATAAATGGACCGTTCGTG                                   |      |
|  |  | Exon 12 | FWD: TATTTGCAAAAGCCCAAACC<br>REV: TTCACAAACCCCAAACAAA        | FWD: TATTTGCAAAAGCCCAAACC                                  |      |
|  |  | Exon 13 | FWD: ATCAAAGCCCAAGGACTCAA<br>REV: TCTCTGCTCGGGATCCTA         | FWD: ATCAAAGCCCAAGGACTCAA                                  | Fail |
|  |  | Exon 14 | FWD: TTGCAGTTGACCAGGTTTCAT<br>REV: AATATTTAACATAATTCGCCAGAAA | FWD: TTGCAGTTGACCAGGTTTCAT                                 |      |
|  |  | Exon 15 | FWD: TGTA AAAATTAGCAGGGGTGTCA<br>REV: ATTAGTGATGCCTGCCTTGG   | FWD: TGTA AAAATTAGCAGGGGTGTCA<br>REV: ATTAGTGATGCCTGCCTTGG |      |
|  |  | Exon 16 | FWD: TCATTTTCTTGATTGTCTAACGTC<br>REV: AAGGACATTTTCTAGCGTCAAA | FWD: TCATTTTCTTGATTGTCTAACGTC                              |      |
|  |  | Exon 17 | FWD: TTGAGATCAAACTCCCTTACTT<br>REV: TGAGTTAGCATAGAGGCAGGA    | FWD: TTGAGATCAAACTCCCTTACTT                                |      |
|  |  | Exon 18 | FWD: TTAGCAAAGTTGCCACCATT<br>REV: GGGGACAAGGTTCTGGAAGT       | FWD: TTAGCAAAGTTGCCACCATT                                  |      |
|  |  | Exon 19 | FWD: TTTTAGCAAAGTTGCCACCATT<br>REV: GGGGACAAGGTTCTGGAAGT     | FWD: TTTTAGCAAAGTTGCCACCATT                                |      |
|  |  | Exon 20 | FWD: GACGTCAGTGGTGAAATGGA<br>REV: ACCACGTGGACCCTAGGAC        | FWD: GACGTCAGTGGTGAAATGGA                                  |      |
|  |  | Exon 21 | FWD: GGAGAGGCGAATATGGCTTA<br>REV: TGGGAAGAGTAGCTGGCATT       | FWD: GGAGAGGCGAATATGGCTTA                                  |      |
|  |  | Exon 22 | FWD: CCCAGAGGGTCATGTCAAGT<br>REV: TGATGGTGTAAACCAAGCAA       | FWD: CCCAGAGGGTCATGTCAAGT                                  |      |
|  |  | Exon 23 | FWD: AGAAGAGGTGGTCCCTGTCC<br>REV: TATGGGTGGCTCCGCTAC         | FWD: AGAAGAGGTGGTCCCTGTCC                                  |      |
|  |  | Exon 24 | FWD: CTCCACAGGAGCAAAGGATG<br>REV: ACCAGGCAGGGTGAAAT          | FWD: CTCCACAGGAGCAAAGGATG                                  |      |
|  |  | Exon 25 | FWD: TCCACCTCACTCAATGCAAA                                    | FWD: TCCACCTCACTCAATGCAAA                                  |      |

|  |  |         |                                                              |                               |      |
|--|--|---------|--------------------------------------------------------------|-------------------------------|------|
|  |  |         | REV: ATGTTCACTGCCACGAATGA                                    |                               |      |
|  |  | Exon 26 | FWD: TGTTCTCTGGGACAGCCAAG<br>REV: GAGATTCCTTTTGGGGGTA        | FWD: TGTTCTCTGGGACAGCCAAG     |      |
|  |  | Exon 27 | FWD: TACCATCTTTCAGCCCCAAA<br>REV: AAACGTGACCACAGAGCAT        | FWD: TACCATCTTTCAGCCCCAAA     |      |
|  |  | Exon 28 | FWD: CCAGGACAACGAGCCTAGC<br>REV: TGCTCAGCACAATTGCCTAC        | FWD: CCAGGACAACGAGCCTAGC      |      |
|  |  | Exon 29 | FWD: GGAGACCCTAGGACCCTTCC<br>REV: GGTGGGAGGAAAGGAGAATC       | FWD: GGAGACCCTAGGACCCTTCC     | Fail |
|  |  | Exon 30 | FWD: GCAGGGGGAACCTTGAATTTT<br>REV: CCCACATGAGGGATTCTGTT      | FWD: GCAGGGGGAACCTTGAATTTT    |      |
|  |  | Exon 31 | FWD: GGGTCTTGGCCAAAAAGTAT<br>REV: GCACAGTACCGTTACTTCCA       | FWD: GGGTCTTGGCCAAAAAGTAT     |      |
|  |  | Exon 32 | FWD: CCAGCCTTGTCATGCTGTAT<br>REV: GGCAGCCTCAATTGCATTC        | FWD: CCAGCCTTGTCATGCTGTAT     |      |
|  |  | Exon 33 | FWD: GCTGGAACAGATGCCTGACT<br>REV: TCTCTGCACCAGTCTACGTCA      | FWD: GCTGGAACAGATGCCTGACT     |      |
|  |  | Exon 34 | FWD: AGCCATCTGTTTCACAACCTCA<br>REV: TTTTCTTCCAGTCTTGGCTATG   | FWD: AGCCATCTGTTTCACAACCTCA   |      |
|  |  | Exon 35 | FWD: GCGCCAGGACTGTTATTTCAG<br>REV: AACCACAGCCTGGTATGCTC      | FWD: GCGCCAGGACTGTTATTTCAG    |      |
|  |  | Exon 36 | FWD: CATTAAAGAGGCTGCCCAGA<br>REV: ATTTTGCCTTGGTCCAAAAA       | FWD: CATTAAAGAGGCTGCCCAGA     |      |
|  |  | Exon 37 | FWD: ACCACCTTCTCTTCCCACAA<br>REV: TGCAGGTAAACAAGGAAGGA       | FWD: ACCACCTTCTCTTCCCACAA     |      |
|  |  | Exon 38 | FWD: CACTCCATGTGAGGTCTGAAG<br>REV: TGCAAATGCAAATGACAACA      | FWD: CACTCCATGTGAGGTCTGAAG    |      |
|  |  | Exon 39 | FWD: CCCTGCCCTTTTTGTGATT<br>REV: GAAAGAATCATGTTTATTGCCAGA    | FWD: CCCTGCCCTTTTTGTGATT      |      |
|  |  | Exon 40 | FWD: CCTCATAGTTTTATATCGCTCACA<br>REV: TTATCCTAAGCCCTCAGAAATG | FWD: CCTCATAGTTTTATATCGCTCACA |      |
|  |  | Exon 41 | FWD: CCAAGCCTTAGGCAGGACTT<br>REV: TCAAGGCTGTGAACAGTTGG       | FWD: CCAAGCCTTAGGCAGGACTT     |      |
|  |  | Exon 42 | FWD: AATCCAGTGCCTGCTCAAGT<br>REV: CCCTGGCAAATGGAATACTG       | FWD: AATCCAGTGCCTGCTCAAGT     |      |
|  |  | Exon 43 | FWD: AACTGAATCATGCTTTGACACC<br>REV: CACCTCATTCCCAAAGAAGG     | FWD: AACTGAATCATGCTTTGACACC   |      |
|  |  | Exon 44 | FWD: TCAAGTGAAGTGTGCAAGTGCT<br>REV: CCTCATGGTCAACACACAGC     | FWD: TCAAGTGAAGTGTGCAAGTGCT   |      |
|  |  | Exon 45 | FWD: CAAATGAATCAAAGAGAGTGAGAC<br>REV: CAAAATTTCTTTTCATTGCTGA | FWD: CAAATGAATCAAAGAGAGTGAGAC |      |
|  |  | Exon 46 | FWD: AAAGGCCCGGTGTACAGAT<br>REV: TGCCATGTTCCCCAGACT          | FWD: AAAGGCCCGGTGTACAGAT      |      |
|  |  | Exon 47 | FWD: GACGGAGAATCTGGGTTTCA<br>REV: GCTGGTGAGTTCACCTGAT        | FWD: GACGGAGAATCTGGGTTTCA     |      |

|  |  |         |                                                              |                                                        |      |
|--|--|---------|--------------------------------------------------------------|--------------------------------------------------------|------|
|  |  | Exon 48 | FWD: TTTTGTCTGAACAGCCTCCA<br>REV: CCCCTCTATGTGTCCTGAA        | FWD: TTTTGTCTGAACAGCCTCCA                              |      |
|  |  | Exon 49 | FWD: GCTGCTTGCTTATTTACATTG<br>REV: GAAAATGTTTCAAAATGATGACTTC | FWD: GCTGCTTGCTTATTTACATTG                             |      |
|  |  | Exon 50 | FWD: AGAATGCAGAAAAGCGTGGT<br>REV: GAAGGGAGTGGCAGAGAATG       | FWD: AGAATGCAGAAAAGCGTGGT                              |      |
|  |  | Exon 51 | FWD: GAACCATCCAGAGTCCAGT<br>REV: GGGACACACTGACAGTTCCT        | FWD: GAACCATCCAGAGTCCAGT<br>REV: GGGACACACTGACAGTTCCT  |      |
|  |  | Exon 52 | FWD: CCCCATTATTCTTCCATT<br>REV: AAAAATGAGCCCCTATGAA          | FWD: CCCCATTATTCTTCCATT                                |      |
|  |  | Exon 53 | FWD: AAGTTCTTCTGAGTCTTGCAGTT<br>REV: ATTTGGCCCTCAGGTCTTCT    | FWD: AAGTTCTTCTGAGTCTTGCAGTT                           |      |
|  |  | Exon 54 | FWD: ATGCCTGGCCTGTTTCATA<br>REV: TTGCCTGGGCTGAGAATATC        | FWD: ATGCCTGGCCTGTTTCATA                               | Fail |
|  |  | Exon 55 | FWD: AAAAGTTGGCTCACACTGGAA<br>REV: CTGGGGTCTGGGAATCATTA      | FWD: AAAAGTTGGCTCACACTGGAA                             |      |
|  |  | Exon 56 | FWD: CACTGACACTGAAGGCGATG<br>REV: AGGGGTGTGGCTGAGAGAA        | FWD: CACTGACACTGAAGGCGATG                              |      |
|  |  | Exon 57 | FWD: GCCTGTGATAGTCCCTGAATAA<br>REV: CATGGACCTGCTTGTCACT      | FWD: GCCTGTGATAGTCCCTGAATAA                            |      |
|  |  | Exon 58 | FWD: CAAATCACCCCATCTTCTCG<br>REV: AGAGGGTAGGTGCTGCTGAA       | FWD: CAAATCACCCCATCTTCTCG                              |      |
|  |  | Exon 59 | FWD: GCCCATTTACTCACCCAACA<br>REV: TCCAGGAGATAAGCAGAGTATGG    | FWD: GCCCATTTACTCACCCAACA                              |      |
|  |  | Exon 60 | FWD: GACAGGAAAGGCACGTTCTC<br>REV: CAAGTGATCCATCTGCCTTG       | FWD: GACAGGAAAGGCACGTTCTC<br>REV: CAAGTGATCCATCTGCCTTG | Fail |
|  |  | Exon 61 | FWD: ACATAACTTGAAGGAAAAGTGG<br>REV: TCCAGGAGCTACCTGCACTC     | FWD: ACATAACTTGAAGGAAAAGTGG                            |      |
|  |  | Exon 62 | FWD: ACCCAGTGGCTCAATCAATC<br>REV: ACACAGGGTCCACACAAGT        | FWD: ACCCAGTGGCTCAATCAATC                              |      |
|  |  | Exon 63 | FWD: CCCAGCTACACTTCAGGTT<br>REV: GGCTTTAGATTACAGGCAAGG       | FWD: CCCAGCTACACTTCAGGTT                               |      |
|  |  | Exon 64 | FWD: AGGAGCAGCAGGCTGAGTT<br>REV: AGGGAGTGGCCAAGTATCT         | FWD: AGGAGCAGCAGGCTGAGTT                               |      |
|  |  | Exon 65 | FWD: CCACATGGAGGCAGGAAA<br>REV: TAACACCGTCCCCTATCTGC         | FWD: CCACATGGAGGCAGGAAA                                |      |
|  |  | Exon 66 | FWD: GGCTGCCTATCAGTGGAGAC<br>REV: CAGCTACCTTGGAGGTTGGA       | FWD: GGCTGCCTATCAGTGGAGAC                              |      |
|  |  | Exon 67 | FWD: TGGCAGTAATAAGGCCAGA<br>REV: AACCACCACTGCTGTTCCCTC       | FWD: TGGCAGTAATAAGGCCAGA<br>REV: AACCACCACTGCTGTTCCCTC | Fail |
|  |  | Exon 68 | FWD: AATGGGCAGACATCGGTAAG<br>REV: CACTGGCTTACAGTCAGCTTG      | AATGGGCAGACATCGGTAAG                                   |      |
|  |  | Exon 69 | FWD: AGGGAGAGTCATGCCTCAGA<br>REV: GGCTGGTGTCTGATTGATG        | FWD: AGGGAGAGTCATGCCTCAGA<br>REV: GGCTGGTGTCTGATTGATG  |      |
|  |  |         |                                                              |                                                        |      |

|                |    |         |                                                               |                             |      |
|----------------|----|---------|---------------------------------------------------------------|-----------------------------|------|
| <i>NT5DC3</i>  | 14 | Exon 1  | FWD: CTGAAATTGACCGCAGCAG<br>REV: GCATTTTTCCCGTTTC             | FWD: CTGAAATTGACCGCAGCAG    | Fail |
|                |    | Exon 2  | FWD: GCATATTTTCAAGGTGAAGCAA<br>REV: CTTCTCTGTGGCAGACTTGG      | FWD: GCATATTTTCAAGGTGAAGCAA |      |
|                |    | Exon 3  | FWD: CCAACCTCCCACTGGTGTAT<br>REV: AAAACTAATTGCCCCGTCA         | FWD: CCAACCTCCCACTGGTGTAT   |      |
|                |    | Exon 4  | FWD: AACAAAGCAACCCTTTCAGGA<br>REV: ACTGCAGCCCTCTTCATCAT       | FWD: AACAAAGCAACCCTTTCAGGA  |      |
|                |    | Exon 5  | FWD: ACAGTGCCTTGCACCTCAAT<br>REV: CAAATTTCCCTGTCAATTCCA       | FWD: ACAGTGCCTTGCACCTCAAT   |      |
|                |    | Exon 6  | FWD: AGTCACGGAAAAGGCTTCT<br>REV: CCACATATAAGAGTCCCAGCTAA      | FWD: AGTCACGGAAAAGGCTTCT    |      |
|                |    | Exon 7  | FWD: GATTTTGTGTAGGGCCTGGA<br>REV: CCTCTGCTTAGCACCTGGAA        | FWD: GATTTTGTGTAGGGCCTGGA   | Fail |
|                |    | Exon 8  | FWD: AGGGCCTTTATCCCTTTCC<br>REV: GTCCCTAGGGCAACAAGTCA         | FWD: AGGGCCTTTATCCCTTTCC    |      |
|                |    | Exon 9  | FWD: CCATTTGTTTTAGCAGCTGGA<br>REV: TGCTTATGATTTTGCAACTGG      | FWD: CCATTTGTTTTAGCAGCTGGA  |      |
|                |    | Exon 10 | FWD: GGTTTTTGCAGGGAGCTACT<br>REV: GAACTGTGCCAGGCATACAG        | FWD: GGTTTTTGCAGGGAGCTACT   |      |
|                |    | Exon 11 | FWD: TTTCCCATGAAGGTGCTTTT<br>REV: AAAATGCAGCCTACTTTTAGGTTTT   | FWD: TTTCCCATGAAGGTGCTTTT   |      |
|                |    | Exon 12 | FWD: TTCATTGAATTCAGCTTGGTG<br>REV: TCTACTGAAAACAACCTTAAGCCTCA | FWD: TTCATTGAATTCAGCTTGGTG  |      |
|                |    | Exon 13 | FWD: GTGCCAGCCTCTGAGATGTA<br>REV: GGATGTTTCAACATTATGCCTCA     | FWD: GTGCCAGCCTCTGAGATGTA   |      |
|                |    | Exon 14 | FWD: GGGCTGCTCTAGGCTAACAT<br>REV: TTTCCAAAAGCAACACTCAGA       | FWD: GGGCTGCTCTAGGCTAACAT   |      |
|                |    |         |                                                               |                             |      |
| <i>HSP90B1</i> | 18 | Exon 1  | FWD: CCCCTCACGAATCCTCATT<br>REV: ACGTAATTCCTTGCCCTCT          | FWD: CCCCTCACGAATCCTCATT    | Fail |
|                |    | Exon 2  | FWD: CATCCCCACCTCCCTTAGTT<br>REV: GCACACAACCTACCGGGTAT        | FWD: CATCCCCACCTCCCTTAGTT   |      |
|                |    | Exon 3  | FWD: AACCCCCAAGACAATATTCAGA<br>REV: TCTGGTAGCAATTCTGGACA      | FWD: AACCCCCAAGACAATATTCAGA |      |
|                |    | Exon 4  | FWD: CTTGCATTGCATACCTGAAGA<br>REV: CCACTGAGACTTGGGGTTT        | FWD: CTTGCATTGCATACCTGAAGA  |      |
|                |    | Exon 5  | FWD: AATTGATGGGACCCAAAGC<br>REV: CAGGAAAATTAAGGCCAGA          | FWD: AATTGATGGGACCCAAAGC    |      |
|                |    | Exon 6  | FWD: AGCTCACAAACCCTTGTGG<br>REV: TGCGGGGATTACAAGCAT           | FWD: AGCTCACAAACCCTTGTGG    |      |
|                |    | Exon 7  | FWD: GAATGAAGGCAAAATGTGGTC<br>REV: GCTCCATGGACTTAGCACCT       | FWD: GAATGAAGGCAAAATGTGGTC  |      |
|                |    | Exon 8  | FWD: CACACCAGTCCTCTGGGTCT<br>REV: TGGGAATGGACCATCTCATATT      | FWD: CACACCAGTCCTCTGGGTCT   |      |

|             |   |        |                                                             |                                |      |
|-------------|---|--------|-------------------------------------------------------------|--------------------------------|------|
| <i>NFYB</i> | 7 | 5'UTR  | FWD: GAAGACCTCGCGCCTAGAG<br>REV: GGAGACGGACATTTTCATTCG      | FWD: GAAGACCTCGCGCCTAGAG       | Fail |
|             |   | Exon 1 | FWD: CAAGCCCTCTTTAATTTTATGAGAA<br>REV: TTCTACCAGGCACCTCCAGT | FWD: CAAGCCCTCTTTAATTTTATGAGAA | Fail |
|             |   | Exon 2 | FWD: CTGGGCCACAGAGTAAGACC<br>REV: TTTTCTATAAAGACACAAGTAGCC  | FWD: CTGGGCCACAGAGTAAGACC      |      |
|             |   | Exon 3 | FWD: TGGTTAAGAGGTGAACCAGAATG<br>REV: TTTGCTGAAAAGCCTGAATGA  | FWD: TGGTTAAGAGGTGAACCAGAATG   |      |
|             |   | Exon 4 | FWD: TTGTCAAGGCTTCTCTCACTTG<br>REV: GCAACAGAGCGATACTCCAC    | FWD: TTGTCAAGGCTTCTCTCACTTG    | Fail |
|             |   | Exon 5 | FWD: GCCTTCTGAAAGCCTTCTTCA<br>REV: CAAATAAAAGGGCATGAACTGA   | FWD: GCCTTCTGAAAGCCTTCTTCA     |      |
|             |   | Exon 6 | FWD: ATGATACCGGGCAGAATTG<br>REV: CCATGACGCCAGCTAAT          | FWD: ATGATACCGGGCAGAATTG       | Fail |
|             |   | Exon 7 | FWD: CACAAGAAATGGGAATTAGACTTG<br>REV: TTAACCCAGCCGCTTACTTG  | FWD: CACAAGAAATGGGAATTAGACTTG  |      |
|             |   | 3'UTR  | FWD: CGAGAGTTTGTGCTCTGTATGA<br>REV: ACATTAACAGGCACGATGAAC   | FWD: CGAGAGTTTGTGCTCTGTATGA    |      |

**Supplementary Table 2. Primer sequences for PCR and DNA sequencing in the chromosome 12 region.**

|                      | rs number  | Variation  | Amino acid change | Number of alleles observed |             |
|----------------------|------------|------------|-------------------|----------------------------|-------------|
|                      |            |            |                   | Affecteds                  | Unaffecteds |
| <b><i>GNPTAB</i></b> |            |            |                   |                            |             |
| Exon1                | rs4764655  | c.18 G>A   | Leu6Leu           | 82 (E, SA)                 | 60 (E, SA)  |
| Exon1                | rs222504   | c.27 G>A   | Gln9Gln           | 6 (E)                      | 1 (SA)      |
| Exon2                | Unknown    | c.136 C>A  | Arg46Arg          | 2 (E, Af)                  | 0           |
| Exon2                | Unknown    | c.174 C>T  | Asp58Asp          | 0                          | 1 (E)       |
| Exon5                | Unknown    | c.513 A>G  | Ala171Ala         | 0                          | 3 (SA)      |
| Exon7                | Unknown    | c.639 A>C  | Thr213Thr         | 1 (E)                      | 0           |
| Exon8                | Unknown    | c.885 G>A  | Leu295Leu         | 1 (SA)                     | 0           |
| Exon11               | Unknown    | c.1395 T>G | Gly465Gly         | 1 (E)                      | 0           |
| Exon12               | rs11111008 | c.1482 G>A | Gln494Gln         | 4 (Af)                     | 0           |
| Exon12               | Unknown    | c.1500 C>T | Asn500Asn         | 1 (E)                      | 0           |
| Exon13               | Unknown    | c.1626 A>G | Glu542Glu         | 1 (Af)                     |             |
| Exon13               | Unknown    | c.1862 A>G | Glu622Glu         | 1 (SA)                     | 0           |
| Exon13               | Unknown    | c.1929 T>G | Ser643Ser         | 0                          | 1 (E)       |
| Exon13               | rs10778148 | c.1932 G>A | Thr644Thr         | 120 (E, Af, SA)            | 63 (E, SA)  |
| Exon13               | Unknown    | c.1986 G>A | Ala662Ala         | 1 (E)                      | 0           |
| Exon13               | Unknown    | c.2493 A>G | Thr831Thr         | 0                          | 1 (E)       |
| Exon13               | Unknown    | c.2625 G>A | Val875Val         | 0                          | 1 (E)       |
| Exon13               | Unknown    | c.2665 T>C | Leu889Leu         | 0                          | 1 (SA)      |
| Exon14               | Unknown    | c.2781 A>G | Leu927Leu         | 1 (E)                      | 0           |
| Exon19               | Unknown    | c.3597 G>A | Gln1199Gln        | 1 (E)                      | 0           |
| <b><i>GNPTG</i></b>  |            |            |                   |                            |             |
| Exon5                | Unknown    | c.255 G>A  | Pro85Pro          | 6 (E, SA)                  | 4 (E)       |
| Exon5                | Unknown    | c.297 C>T  | Asn99Asn          | 0                          | 1 (E)       |
| Exon6                | Unknown    | c.375 C>T  | Asp125Asp         | 1 (E)                      | 0           |
| Exon11               | Unknown    | c.903 G>A  | Leu301Leu         | 1 (E)                      | 0           |
| <b><i>NAGPA</i></b>  |            |            |                   |                            |             |
| Exon2                | rs2972272  | c.333 G>A  | Gly111Gly         | 229 (E, Af, SA)            | 220 (E, SA) |
| Exon2                | Unknown    | c.381 G>T  | Ala127Ala         | 4 (Af)                     | 1 (E)       |
| Exon5                | Unknown    | c.870 T>G  | Ser290Ser         | 1 (E)                      | 0           |
| Exon5                | Unknown    | c.888 C>T  | Asn296Asn         | 1 (E)                      | 0           |
| Exon6                | Unknown    | c.1122 G>A | Thr374Thr         | 1 (H)                      | 0           |
| Exon8                | Unknown    | c.1203 C>G | Gly401Gly         | 0                          | 3 (E)       |
| Exon9                | Unknown    | c.1319 A>G | Gly440Gly         | 0                          | 1 (E)       |
| Exon10               | rs887854   | c.1484 T>C | Asn495Asn         | 232 (E, Af, SA)            | 242 (E, SA) |

**Table 3a. Synonymous SNPs found in the exons of *GNPTAB*, *GNPTG* and *NAGPA* genes.**

| rs number     | Variation    | Number of alleles observed |             |
|---------------|--------------|----------------------------|-------------|
|               |              | Affecteds                  | Unaffecteds |
| <b>GNPTAB</b> |              |                            |             |
| Unknown       | -1661 T>C    | 22 (E, Af)                 | 5 (E)       |
| Unknown       | -1642 C>T    | 2 (Af)                     | 0           |
| Unknown       | -1641 C>T    | 0                          | 1 (E)       |
| Unknown       | -1629 T>C    | 1 (Af)                     | 0           |
| Unknown       | -1538 C>G    | 0                          | 1 (As)      |
| Unknown       | -1432 C>A    | 0                          | 1 (E)       |
| Unknown       | -1412 G>A    | 2 (E, Af)                  | 0           |
| rs10778152    | -1298 T>C    | 128 (E, Af, SA)            | 133 (E, SA) |
| Unknown       | -1255 G>C    | 1 (SA)                     | 0           |
| Unknown       | -1252 C>A    | 3 (E, Af)                  | 0           |
| Unknown       | -1175 GG>GGG | 1 (SA)                     | 0           |
| Unknown       | -1161 G>A    | 1 (E)                      | 2 (E)       |
| rs4237981     | -1158 T>A    | 346 (E, Af, SA)            | 340 (E, SA) |
| Unknown       | -1030 T>C    | 0                          | 2 (E)       |
| Unknown       | -961 A>T     | 3 (E, Af)                  | 0           |
| Unknown       | -919 C>A     | 6 (E, SA)                  | 9 (E)       |
| rs4764826     | -868 C>G     | 350 (E, Af, SA)            | 334 (E, Af) |
| Unknown       | -820 T>G     | 0                          | 1 (E)       |
| Unknown       | -749 C>G     | 1 (Af)                     | 0           |
| Unknown       | -717 T>C     | 2 (Af)                     | 0           |
| Unknown       | -516 G>A     | 0                          | 1 (SA)      |
| <b>GNPTG</b>  |              |                            |             |
| Unknown       | -1762 C>T    | 4 (E, SA)                  | 4 (SA)      |
| Unknown       | -1727 C>T    | 0                          | 1 (SA)      |
| Unknown       | -1726 G>A    | 4 (SA)                     | 4 (SA)      |
| Unknown       | -1707 C>G    | 0                          | 1 (SA)      |
| Unknown       | -1706 C>A    | 2 (E)                      | 0           |
| Unknown       | -1659 C>T    | 0                          | 2 (SA)      |
| Unknown       | -1649 C>T    | 0                          | 1 (SA)      |
| Unknown       | -1609 C>T    | 1 (E)                      | 0           |
| Unknown       | -1591 C>T    | 1 (E)                      | 1 (E)       |
| Unknown       | -1535 A/G    | 1 (E)                      | 4 (E, SA)   |
| rs11248873    | -1489 C>T    | 302 (E, Af, SA)            | 247 (E, SA) |
| Unknown       | -1443 G>C    | 0                          | 1 (E)       |
| Unknown       | -1380 A>G    | 1 (E)                      | 0           |
| Unknown       | -1326 C>G    | 0                          | 1 (E)       |
| rs34961818    | -1274 C>T    | 338 (E, Af, SA)            | 275 (E, SA) |
| Unknown       | -1257 T>A    | 3 (SA)                     | 3 (SA)      |
| Unknown       | -1171 C>T    | 1 (SA)                     | 0           |
| Unknown       | -1145 G>A    | 1 (SA)                     | 0           |
| Unknown       | -790 G>A     | 1 (SA)                     | 0           |
| Unknown       | -780 T>C     | 66 (E, SA)                 | 23 (E, SA)  |
| Unknown       | -122 C>G     | 39 (E, SA)                 | 24 (E, SA)  |
| Unknown       | -60 C>T      | 1 (SA)                     | 2 (SA)      |
| Unknown       | 16bp del     | 0                          | 2 (E)       |
| Unknown       | -40 C>A      | 1 (Af)                     | 0           |
| <b>NAGPA</b>  |              |                            |             |
| Unknown       | -1715G>A     | 2 (Af)                     | 0           |
| Unknown       | -1656C>-     | 1 (E)                      | 0           |
| Unknown       | -1620C>G     | 1 (H)                      | 0           |
| Unknown       | -1573C>g     | 2 (Af)                     | 0           |
| Unknown       | -1552T>C     | 1 (H)                      | 0           |
| rs9937510     | -1421G>A     | 211 (E, Af, SA)            | 245 (E, SA) |
| Unknown       | -1290G>A     | 7 (E, SA)                  | 8 (E)       |

|           |                                 |                |            |
|-----------|---------------------------------|----------------|------------|
| Unknown   | -1267C>G                        | 0              | 1 (E)      |
| Unknown   | -1150~-1157<br>AGAGCAAA/gagcgag | 2 (SA)         | 1 (SA)     |
| Unknown   | -483T>A                         | 3 (Af)         | 1 (E)      |
| Unknown   | -435A>G                         | 4 (E, SA)      | 1 (SA)     |
| Unknown   | -428G>A                         | 1 (E)          | 0          |
| Unknown   | -424~-423 GC/tt                 | 0              | 1 (E)      |
| Unknown   | -373G>C                         | 2 (Af)         | 0          |
| Unknown   | -284T>C                         | 1 (As)         | 0          |
| rs2937109 | -262C>A                         | 44 (E, Af, SA) | 67 (E, SA) |
| Unknown   | -231G>A                         | 1 (E)          | 0          |
| Unknown   | -195G>C                         | 0              | 1 (E)      |

**Table 3b. SNPs found in the 5' upstream regions of *GNPTAB*, *GNPTG* and *NAGPA* genes.**

|               | rs number  | Variation   | Amino acid change | Conservation  | Plausibility as causative | Number of alleles observed |             |
|---------------|------------|-------------|-------------------|---------------|---------------------------|----------------------------|-------------|
|               |            |             |                   |               |                           | Affecteds                  | Unaffecteds |
| <b>GNPTAB</b> |            |             |                   |               |                           |                            |             |
| Exon1         | Unknown    | c.70 T>G    | Phe24Val          | Not Conserved | No                        | 1 (E)                      | 0           |
| Exon2         | Unknown    | c.137 G>A   | Arg46Gln          | Conserved     | No                        | 3 (E)                      | 3 (E)       |
| Exon4         | Unknown    | c.337 A>G   | Lys113Glu         | Conserved     | No                        | 1 (H)                      | 0           |
| Exon5         | Unknown    | c.559 G>C   | Ser187Thr         | Not Conserved | No                        | 1 (E)                      | 0           |
| Exon6         | Unknown    | c.580 G>A   | Ala194Thr         | Conserved     | Yes                       | 0                          | 1 (E)       |
| Exon9         | Unknown    | c.961 A>G   | Ser321Gly         | Conserved     | Yes                       | 1 (SA)                     | 0           |
| Exon9         | rs7958709  | c.1042 A>C  | Ile348Leu         | Conserved     | No                        | 2 (Af)                     | 0           |
| Exon10        | Unknown    | c.1283 A>G  | Lys428Arg         | Conserved     | No                        | 1 (Af)                     | 0           |
| Exon11        | Unknown    | c.1363 G>T  | Ala455Ser         | Conserved     | Yes                       | 2 (E)                      | 0           |
| Exon12        | Unknown    | c.1433 T>C  | Ile478Thr         | Not Conserved | No                        | 1 (SA)                     | 1 (SA)      |
| Exon13        | Unknown    | c.1668 A>C  | Ile557Leu         | Not Conserved | No                        | 1 (H)                      | 0           |
| Exon13        | Unknown    | c.1804 A>G  | Ile601Met         | Not Conserved | No                        | 0                          | 1 (E)       |
| Exon13        | Unknown    | c.1875 C>G  | Phe624Leu         | Conserved     | Yes                       | 1 (SA)                     | 0           |
| Exon13        | Unknown    | c.1931 C>T  | Thr644Ile         | Conserved     | No                        | 8 (E, Af)                  | 0           |
| Exon13        | Unknown    | c.1948 G>A  | Glu650Lys         | Not Conserved | No                        | 1 (E)                      | 0           |
| Exon13        | Unknown    | c.2081 A>C  | Lys694Thr         | Not Conserved | No                        | 0                          | 1 (SA)      |
| Exon13        | Unknown    | c.2582 G>A  | Arg861Lys         | Not Conserved | No                        | 1 (Af)                     | 0           |
| Exon13        | Unknown    | c.2610 G>A  | Gly871Ser         | Not Conserved | No                        | 2 (E, Af)                  | 0           |
| Exon16        | rs34083392 | c.3197 C>A  | Thr1066Met        | Conserved     | No                        | 1 (Af)                     | 0           |
| Exon19        | Unknown    | c.3598 G>A  | Glu1200Lys        | Conserved     | Yes                       | 10 (SA)                    | 1 (SA)      |
| <b>GNPTG</b>  |            |             |                   |               |                           |                            |             |
| Exon1         | Unknown    | c.19 C>T    | Arg7Trp           | Not Conserved | No                        | 0                          | 2 (SA)      |
| Exon1         | Unknown    | c.11_19 dup | Leu 5 Arg 7 dup   | Not Conserved | Yes                       | 1 (E)                      | 0           |
| Exon2         | Unknown    | c.74 C>A    | Ala25Glu          | Not Conserved | Yes                       | 2 (E)                      | 0           |
| Exon7         | Unknown    | c.472 G>A   | Val158Ile         | Conserved     | No                        | 2 (E)                      | 1 (E)       |
| Exon7         | Unknown    | c.479 C>T   | Ala160Val         | Not Conserved | No                        | 0                          | 1 (SA)      |
| Exon7         | Unknown    | c.502 G>A   | Val168Ile         | Conserved     | Yes                       | 0                          | 1 (SA)      |
| Exon9         | Unknown    | c.688 C>G   | Leu230Val         | Conserved     | Yes                       | 1 (SA)                     | 0           |
| Exon10        | rs8062558  | c.814 A>G   | Arg272Gly         | Not Conserved | No                        | 0                          | 1 (E)       |
| <b>NAGPA</b>  |            |             |                   |               |                           |                            |             |
| Exon2         | Unknown    | c.252 C>G   | His84Gln          | Not Conserved | Yes                       | 2 (E)                      | 0           |
| Exon2         | Unknown    | c.299 C>T   | Pro100Leu         | Conserved     | No                        | 0                          | 1 (SA)      |

|        |         |                |                 |               |     |        |       |
|--------|---------|----------------|-----------------|---------------|-----|--------|-------|
| Exon6  | Unknown | c.982 C>T      | Arg328Cys       | Conserved     | Yes | 4 (E)  | 0     |
| Exon8  | Unknown | c.1243 G>C     | Asp415His       | Conserved     | Yes | 0      | 1 (E) |
| Exon9  | Unknown | c.1320 G>C     | Gly440Ala       | Not Conserved | No  | 1 (SA) | 1 (E) |
| Exon10 | Unknown | c.1538_1553del | Phe513SerfsX113 | Conserved     | Yes | 1 (E)  | 0     |

**Table 3c. Non-synonymous variations found in the exons of *GNPTAB*, *GNPTG* and *NAGPA* genes.**

**Supplementary Table 3. Cumulative list of all variants observed in *GNPTAB*, *GNPTG* and *NAGPA* genes in unrelated cases and controls.** Subject numbers: PKSTR = unrelated Pakistani affected, NA = unrelated North American affected, NAC = unrelated North American control, PKST = Pakistani stuttering family, RNP = unrelated normal Pakistani. Ancestry: SA = South Asian, E = European. H = Hispanic, Af = African American. Reference sequences for numbering the mutation positions in *GNPTAB*, *GNPTG* and *NAGPA* are NM\_024312, NM\_032520 and NM\_016256 respectively.
